1                   **Development of Optically-Controlled “Living Electrodes” with Long-Projecting**  
2                   **Axon Tracts for a Synaptic Brain-Machine Interface**

3  
4                   Dayo O. Adewole<sup>1,2,3,4</sup>, Laura A. Struzyna<sup>1,2,3,4</sup>, James P. Harris<sup>1,2</sup>, Ashley D. Nemes<sup>1,2</sup>,  
5                   Justin C. Burrell<sup>1,2,3</sup>, Dmitriy Petrov<sup>1,2</sup>, Reuben H. Kraft<sup>5</sup>, H. Isaac Chen<sup>1,2</sup>,  
6                   Mijail D. Serruya<sup>2,6</sup>, John A. Wolf<sup>1,2</sup>, D. Kacy Cullen<sup>1,2,3,4,\*</sup>

- 7  
8  
9                   (1) Center for Brain Injury & Repair, Department of Neurosurgery, Perelman School of Medicine,  
10                   University of Pennsylvania, Philadelphia, PA, 19104, USA;  
11                   (2) Center for Neurotrauma, Neurodegeneration & Restoration, Corporal Michael J. Crescenz  
12                   Veterans Affairs Medical Center, Philadelphia, PA, 19104, USA;  
13                   (3) Department of Bioengineering, School of Engineering and Applied Science, University of  
14                   Pennsylvania, Philadelphia, PA, 19104, USA;  
15                   (4) Center for Neuroengineering & Therapeutics, University of Pennsylvania, Philadelphia, PA,  
16                   19104, USA  
17                   (5) Computational Biomechanics Group, The Pennsylvania State University, University Park, PA,  
18                   16802, USA;  
19                   (6) Department of Neurology, Thomas Jefferson University, Philadelphia, PA, 19107, USA.

20  
21                   Number of text pages: 11

Number of Figures: 7+ 2 Supplemental

22                   \*Corresponding author:

23                   D. Kacy Cullen, Ph.D.

24                   105E Hayden Hall/3320 Smith Walk

25                   Philadelphia, PA 19104

26                   Ph: 215-746-8176    Fx: 215-573-3808

27                   Email: [dkacy@pennteamedicine.upenn.edu](mailto:dkacy@pennteamedicine.upenn.edu)

## Abstract

Achievements in intracortical neural interfaces are compromised by limitations in specificity and long-term performance. A biological intermediary between devices and the brain may offer improved specificity and longevity through natural synaptic integration with deep neural circuitry, while being accessible on the brain surface for optical read-out/control. Accordingly, we have developed the first “living electrodes” comprised of implantable axonal tracts protected within soft hydrogel cylinders for the biologically-mediated monitoring/modulation of brain activity. Here we demonstrate the controlled fabrication, rapid axonal outgrowth, reproducible cytoarchitecture, and simultaneous optical stimulation and recording of neuronal activity within these engineered constructs *in vitro*. We also present their transplantation, survival, integration, and optical recording in rat cortex *in vivo* as a proof-of-concept for this neural interface paradigm. The creation and functional validation of these preformed, axon-based “living electrodes” is a critical step towards developing a new class of biohybrid neural interfaces to probe and modulate native circuitry.

## Keywords

Neuromodulation; living scaffolds; neural tissue engineering; cell transplant; biomaterials; regeneration; brain-computer interface; neurodegeneration; axon pathfinding; synapse

## Introduction

Techniques for neuromodulation (such as deep brain stimulation for Parkinson’s disease) and neural recording (commonly called brain-computer interfaces (BCIs)) can electrically stimulate or capture neuronal activity within the brain<sup>1</sup>. These methods have been developed for a range of investigative and clinical goals, from cochlear implants for the hearing-impaired to computer control for those with neuromuscular disorders<sup>1</sup>. Despite significant milestones to date, several issues have limited the potential medical impact of these neural interface technologies. Broadly, implantable BCIs use inorganic microelectrodes, which often exhibit diminished performance over time due to biotic (inflammation, neuronal loss, and glial scarring) and abiotic (biostability issues including decreasing impedance due to loss of insulation, mechanical failure) factors, impeding recording quality<sup>1-5</sup>. In neuromodulation, effectiveness is limited by the inability to target specific neurons or neuronal subtypes (e.g. excitatory vs. inhibitory neurons) within the volume of charge injection and the thresholds for both safe and functional therapeutic stimulation<sup>6</sup>. Specific cell types may be targeted by using optogenetics to activate genetically modified neurons via spatial distribution of light. However, the light scattering properties of tissue block precise photostimulation of neurons more than a few hundred microns deep<sup>7</sup>. Implantable optical fibers, lenses, or micro-LEDs have been used, yet chronic performance is limited by the foreign body response and/or overheating of surrounding tissue<sup>8,9</sup>. Further, the longevity and immune response in humans is unknown for virally transduced optogenetic proteins. Finally, across electric and/or optical input-output paradigms, the information transfer bandwidth limits the quality of the neural interface. The ability to address these design challenges – compatibility with the brain, target specificity, and long-term stability – will direct the utility and clinical translation of future neuromodulation and neural recording technologies.

To begin to address these limitations, we have developed micro-Tissue Engineered Neural Networks ( $\mu$ TENNs).  $\mu$ TENNs are comprised of discrete population(s) of neurons connected by long bundles of axons protected within a microscopic hydrogel cylinder (“microcolumn”) (Figure 1)<sup>10,11</sup>.  $\mu$ TENNs were originally developed to reconstruct lost or damaged neuroanatomy following brain injury, and previously demonstrated neuronal survival, maintenance of axonal architecture, and synaptic integration with host cortical neurons following targeted microinjection into rats<sup>10,11</sup>. Here, we further develop this tissue engineering approach into a putative “living electrode”; that is, a self-contained, implantable, synaptically-based conduit to affect neuronal activity.<sup>10-12</sup> Our efforts to advance the  $\mu$ TENN

82 technology in this manner may uniquely address challenges in current neuromodulation and neural  
83 recording strategies (Figure 1J). In this radical paradigm, the  $\mu$ TENN is implanted at a predetermined  
84 depth to synaptically integrate with local neural circuitry and propagate neuronal activity along  $\mu$ TENN  
85 axons to/from an externalized apparatus at the brain surface (Figure 1J). The segregation of biological  
86 and inorganic material may ameliorate the foreign body response and improve long-term stability.  
87 Moreover, the  $\mu$ TENN neuronal phenotype may be selected to preferentially synapse certain neurons  
88 or elicit a desired excitatory, inhibitory, or modulatory effect. Finally,  $\mu$ TENNs may be transduced to  
89 express optogenetic proteins prior to implant, enabling light-driven neuromodulation (through  
90 photostimulation of the  $\mu$ TENN neurons to influence downstream cortical activity) or monitoring  
91 (recording  $\mu$ TENN neurons as a representation of multiple cortical synaptic inputs). In this way  $\mu$ TENNs  
92 may serve as a biologically-based, selective, and potentially permanent neural interface. The present  
93 work details the fabrication and characterization of next-generation axon-based  $\mu$ TENNs *in vitro*,  
94 including growth, viability, maturation, and structure. We also demonstrate light-driven control of  
95  $\mu$ TENNs *in vitro*,  $\mu$ TENN implantation, survival, and integration in the rodent cortex, and optical  
96 monitoring of  $\mu$ TENN activity *in vivo* as proof-of-concept for optically-controlled living electrodes.  
97

## 98 **Materials and Methods**

99 All procedures were approved by the Institutional Animal Care and Use Committees at the University of  
100 Pennsylvania and the Michael J. Crescenz Veterans Affairs Medical Center and adhered to the  
101 guidelines set forth in the NIH Public Health Service Policy on Humane Care and Use of Laboratory  
102 Animals (2015).  
103

### 104 **Cortical Neuron Isolation and Culture**

105 Neural cell isolation and culture protocols are similar to that of published work<sup>10,11</sup>. Briefly, timed-  
106 pregnant rats were euthanized, and the uterus removed. Embryonic day 18 fetuses were transferred  
107 from the uterus to cold HBSS, wherein the brains were extracted and the cerebral cortical hemispheres  
108 isolated under a stereoscope via microdissection. Cortical tissue was dissociated in 0.25% trypsin +  
109 1mM EDTA at 37°C, after which the trypsin/EDTA was removed and replaced with 0.15 mg/ml DNase  
110 in HBSS. Dissociated tissue + DNase was centrifuged for 3 min at 3000 RPM before the DNase was  
111 removed and the cells re-suspended in neuronal culture media, composed of Neurobasal<sup>®</sup> + B27<sup>®</sup> +  
112 Glutamax<sup>™</sup> (ThermoFisher) and 1% penicillin-streptomycin.  
113

### 114 **Micro-Tissue Engineered Neural Network ( $\mu$ TENN) Fabrication**

115  $\mu$ TENNs were constructed in a three-phase process (Figure 1A-C). First, agarose microcolumns of a  
116 specified geometry (outer diameter (OD), inner diameter (ID), and length) were formed in a custom-  
117 designed acrylic mold as described in earlier work (Figure 1A)<sup>13</sup>. The mold is an array of cylindrical  
118 channels that allow for the insertion of acupuncture needles (Seirin, Weymouth, MA) such that the  
119 needles are concentrically aligned within the channels. The mold has been fabricated with more precise  
120 machining equipment relative to earlier work to better ensure concentric tolerance of the needles and  
121 channels. Molten agarose in Dulbecco's phosphate buffered saline (DPBS) was poured into the mold-  
122 needle assembly and allowed to cool (agarose: 3% weight/volume). Once the agarose solidified, the  
123 needles were removed and the mold disassembled, yielding hollow agarose microcolumns with a  
124 specific outer diameter equal to the size of the channels and inner diameter equal to the outer diameter  
125 of the needles. Microcolumns were sterilized via UV light for 30 min and stored in DPBS to prevent  
126 dehydration until needed. For these studies, the mold channels were 398  $\mu$ m in diameter and the  
127 acupuncture needles were 180  $\mu$ m, resulting in microcolumns with a 398  $\mu$ m OD and a 180  $\mu$ m ID.  
128 Microcolumns were cut to the desired length for each cohort, as described below.  
129

130 Next, primary cortical neurons were forced into spheroidal aggregates (Figure 1C). These aggregates  
131 provide the necessary architecture for the growth of long axonal fascicles spanning the length of the  
132 microcolumn. To create aggregates, dissociated cells were transferred to an array of inverted pyramidal

133 wells made in PDMS (Sylgard 184, Dow Corning) cast from a custom-designed, 3D printed mold  
134 (Figure 1B). Dissociated cortical neurons were suspended at a density of 1.0-2.0 million cells/ml and  
135 centrifuged in the wells at 200g for 5 min. This centrifugation resulted in forced aggregation of neurons  
136 with precise control of the number of neurons per aggregate/sphere (12  $\mu$ L cell suspension per well).  
137 Pyramidal wells and forced aggregation protocols were adapted from Ungrin et al <sup>14</sup>.

138  
139 Finally, microcolumns were removed from DPBS and excess DPBS removed from the microcolumn  
140 channels via micropipette. Microcolumns were then filled with extracellular matrix (ECM) comprised of  
141 1.0 mg/ml rat tail collagen + 1.0 mg/ml mouse laminin (Reagent Proteins, San Diego, CA) (Figure 1C).  
142 Unidirectional or bidirectional  $\mu$ TENNs were seeded by carefully placing an aggregate at one or both  
143 ends of the microcolumns, respectively, using fine forceps under a stereoscope, and were allowed to  
144 adhere for 45 min at 37°C, 5% CO<sub>2</sub>. To create dissociated  $\mu$ TENNs, dissociated cortical neurons were  
145 transferred via micropipette into the ECM-filled microcolumn as detailed in prior work <sup>10,11</sup>.  $\mu$ TENNs  
146 were then allowed to grow in neuronal culture media with fresh media replacements every 2 days *in*  
147 *vitro* (DIV).

### 148 149 **Growth Characterization**

150 Phase-contrast microscopy images of  $\mu$ TENNs in culture were taken at 1, 3, 5, 8, and 10 DIV at 10x  
151 magnification using a Nikon Eclipse Ti-S microscope, paired with a QIClick camera and NIS Elements  
152 BR 4.13.00.  $\mu$ TENNs were fabricated for classification into one of the following groups: dissociated/2  
153 mm long (LE<sub>DISS,2</sub>) (n = 7), unidirectional/2 mm long (LE<sub>UNI,2</sub>) (n = 6), unidirectional/5 mm long (LE<sub>UNI,5</sub>)  
154 (n = 3), bidirectional/2 mm long (LE<sub>BI,2</sub>) (n = 15), bidirectional/3 mm long (LE<sub>BI,3</sub>) (n = 12), bidirectional/5  
155 mm long (LE<sub>BI,5</sub>) (n = 17), bidirectional/7 mm long (LE<sub>BI,7</sub>) (n = 8), bidirectional/9 mm long (LE<sub>BI,9</sub>) (n =  
156 3). Growth rates for each group at specific timepoints were quantified as the change in the length of the  
157 longest identifiable neurite divided by the number of days between the current and preceding timepoint.  
158 The longest neurites were manually identified within each phase image using ImageJ (National  
159 Institutes of Health, MD), and length was measured from the edge of the source aggregate to the  
160 neurite tip. To standardize measurements, the edge of the source aggregate identified at 1 DIV was  
161 used as the reference point across subsequent timepoints. Growth was measured until axons crossed  
162 the length of the column (for unidirectional constructs) or axons crossed the distance between  
163 aggregates (for bidirectional constructs). Growth rates were averaged for each timepoint, with the  
164 average maximum and minimum growth rates and average crossing time compared across aggregate  
165  $\mu$ TENNs with one-way analysis of variance (ANOVA). Post-hoc analysis was performed where  
166 necessary with the Bonferroni procedure (p<0.05 required for significance). For reference, planar  
167 cultures of cortical neurons (n = 10) were grown in parallel with  $\mu$ TENN cultures, with the longest  
168 identifiable neurites measured at 1, 3, and 5 DIV. Single neurites could not be identified at later  
169 timepoints due to culture maturation. Axonal outgrowth in planar cultures was taken as the average  
170 growth rate across timepoints, which were compared via unpaired t-test. All data presented as mean  $\pm$   
171 s.e.m.

172  
173 To identify aggregate-specific growth across the microcolumns, cortical neuronal aggregates were  
174 labeled with either green fluorescent protein (GFP) or the red fluorescent protein mCherry via adeno-  
175 associated virus 1 (AAV1) transduction (Penn Vector Core, Philadelphia, PA). Briefly, after centrifuging  
176 aggregates in the pyramid wells, 1  $\mu$ L of AAV1 packaged with the human Synapsin-1 promoter was  
177 added to the aggregate wells (final titer:  $\sim 3 \times 10^{10}$  viral copies/mL). Aggregates were incubated at 37°C,  
178 5% CO<sub>2</sub> overnight before the media was replaced twice, after which transduced aggregates were  
179 plated in microcolumns as described above, each with one GFP<sup>+</sup> and one mCherry<sup>+</sup> aggregate (n = 6).  
180 Over multiple DIV, images of the  $\mu$ TENNs were taken on a Nikon A1RSI Laser Scanning confocal  
181 microscope paired with NIS Elements AR 4.50.00. Sequential slices of 10-20  $\mu$ m in the z-plane were  
182 acquired for each fluorescent channel. All confocal images presented are maximum intensity  
183 projections of the confocal z-slices.

184

185

## Viability Assessment

186

187

188

189

190

191

192

193

194

195

196

197

198

199

200

201

## Optical Stimulation, Calcium Imaging, and Optical Recording Analysis

202

203

204

205

206

207

208

209

210

211

212

213

214

215

216

217

218

219

220

221

To verify whether the fluctuations in calcium reporter fluorescence could be associated with synaptic transmission, bidirectional  $\mu$ TENNs 1.0-1.2mm in length were fabricated and transduced with GCaMP6f ( $n = 3$ ). At 10 DIV,  $\mu$ TENNs were moved to a stage-mounted warming chamber maintaining incubator conditions ( $37^{\circ}\text{C}$ ,  $5\% \text{CO}_2$ ) to record fluorescent calcium reporter activity as described above, with acquisition frequencies of 25-30 frames per second. After 30s of recording spontaneous activity, the NMDA receptor antagonist D-APV ( $50 \mu\text{M}$ ) and AMPA receptor antagonist CNQX ( $10 \mu\text{M}$ ) were added to the media containing the  $\mu$ TENNs; recordings were then continued for 20min. Subsequently, media containing D-APV and AMPA was removed and replaced with fresh neuronal culture media.  $\mu$ TENNs were kept at  $37^{\circ}\text{C}$ ,  $5\% \text{CO}_2$  overnight, after which spontaneous activity was recorded for an additional 60s.

232

233

234

Following optical stimulation and/or recording, regions of interest (ROIs) containing neurons and background ROIs were identified from the calcium recordings. The mean pixel intensities for each ROI

235 were imported into MATLAB for further analysis via custom scripts (MathWorks Inc). Within MATLAB,  
236 the background ROI intensity for each recording was subtracted from active ROIs. Ten such ROIs were  
237 randomly selected and averaged to obtain a representative fluorescence intensity trace across each  
238 output aggregate. Subsequently, the percent change in fluorescence intensity over time ( $\Delta F/F_0$ ) was  
239 calculated for each mean ROI, where  $\Delta F$  equals ( $F_T - F_0$ ),  $F_T$  is the mean ROI fluorescent intensity at  
240 time T, and  $F_0$  is the average of the lower half of the preceding intensity values within a predetermined  
241 sampling window<sup>16</sup>. The peak  $\Delta F/F_0$  for each train was averaged per  $\mu$ TENN for each of the given  
242 stimulation intensities. The average maximum  $\Delta F/F_0$  was then compared across stimulation intensities  
243 with a one-way ANOVA, with post-hoc analysis performed where necessary with the Tukey procedure  
244 ( $p < 0.05$  required for significance). Additionally, the peak  $\Delta F/F_0$  of the output aggregate under  
245 620nm/control stimulation was compared to that under 465nm stimulation at 300 mA/28 mW/mm<sup>2</sup> using  
246 an unpaired t-test ( $p < 0.05$  required for significance). All data presented as mean  $\pm$  s.e.m.

247

### 248 **Immunocytochemistry**

249  $\mu$ TENNs were fixed in 4% formaldehyde for 35 min at 4, 10, and 28 DIV (n = 6, 4, and 8, respectively).  
250  $\mu$ TENNs were then rinsed in 1x PBS and permeabilized with 0.3% Triton X100 + 4% horse serum in  
251 PBS for 60 min before being incubated with primary antibodies overnight at 4°C. Primary antibodies  
252 were Tuj-1/beta-III tubulin (T8578, 1:500, Sigma-Aldrich) to label axons and synapsin-1 (A6442, 1:500,  
253 Invitrogen) to label pre-synaptic specializations. Following primary antibody incubation,  $\mu$ TENNs were  
254 rinsed in PBS and incubated with fluorescently labeled secondary antibodies (1:500; sourced from Life  
255 Technologies & Invitrogen) for 2h at 18°-24°C. Finally, Hoechst (33342, 1:10,000, ThermoFisher) was  
256 added for 10 min at 18°-24°C before rinsing in PBS.  $\mu$ TENNs were imaged on a Nikon A1RSI Laser  
257 Scanning confocal microscope paired with NIS Elements AR 4.50.00. Sequential slices of 10-20  $\mu$ m in  
258 the z-plane were acquired for each fluorescent channel. All confocal images presented are maximum  
259 intensity projections of the confocal z-slices.

260

### 261 **Cortical Implantation and Intravital Calcium Imaging**

262 As a proof-of-concept for  $\mu$ TENN behavior *in vivo*, bidirectional, approximately 1.5mm-long  $\mu$ TENNs  
263 expressing GCaMP were delivered into the brain via stereotaxic microinjection using similar  
264 methodology to that described in prior work<sup>10,11</sup>. Male Sprague-Dawley rats weighing 325-350 grams  
265 were anesthetized with isoflurane at 1.0-2.0 liters per minute (induction: 5.0%, maintenance: 1-5-2.0%)  
266 and mounted in a stereotactic frame. Meloxicam (2.0 mg/kg) and bupivacaine (2.0 mg/kg) were given  
267 subcutaneously at the base of the neck and along the incision line, respectively. The area was shaved  
268 and cleaned with betadine solution, after which a small craniotomy was made over the primary visual  
269 cortex (V1) (coordinates: -5.0mm AP,  $\pm$ 4.0mm ML relative to bregma).  $\mu$ TENNs were loaded into a  
270 needle coupled to a Hamilton syringe and mounted onto a stereotactic arm. To deliver the constructs  
271 into the brain without forcible expulsion, the needle was mounted on a micromanipulator and slowly  
272 inserted into the cortex to a depth of 1.0 mm such that the dorsal  $\mu$ TENN terminal was left ~500  $\mu$ m  
273 above the brain surface. The plunger of the Hamilton syringe was then immobilized, while the needle  
274 containing the  $\mu$ TENN was slowly raised. Upon needle removal from the brain, the dorsal aggregate of  
275 the  $\mu$ TENN was immersed in artificial cerebrospinal fluid (aCSF) warmed to 37° C. To protect the dorsal  
276  $\mu$ TENN terminal and enable imaging of the  $\mu$ TENN and surrounding tissue, 2 PDMS discs (5.0mm  
277 outer diameter, 2.0mm inner diameter, 0.35mm thickness) were placed over the craniotomy/ $\mu$ TENN  
278 and secured to the skull with cyanoacrylate glue. A 3.0mm-diameter glass coverslip was sandwiched  
279 between the 2 discs.

280

281 At five and ten days post-implant, animals were again anesthetized and mounted on a stereotactic  
282 frame for multiphoton calcium imaging of the implant.  $\mu$ TENNs were imaged on a Nikon A1RMP+  
283 multiphoton confocal microscope paired with NIS Elements AR 4.60.00 and a 16x immersion objective.  
284 Recordings of the  $\mu$ TENNs' dorsal aggregates were taken at 3-5 frames per second, similarly to other  
285 intravital work<sup>17</sup>. Post-recording, ROIs of  $\mu$ TENN neurons were manually identified, with the mean pixel

286 intensity of each ROI plotted over time. To distinguish neuronal activity from the animal breathing  
287 artifact, the fast Fourier transform (FFT) of the mean pixel intensity averaged across 10-15 ROIs was  
288 used to identify the frequency peak(s) associated with the observed breathing rate during imaging.  
289 Peaks were identified as frequencies whose amplitudes were 2 standard deviations or more than the  
290 average amplitude of the Fourier spectra.

### 291 **Tissue Harvest and Histology**

292 Post-implant, rats were anesthetized with 150 mg/kg euthasol (Midwest) and transcardially perfused  
293 with cold heparinized saline and 10% formalin. After post-fixation of the head overnight, the brain was  
294 harvested and stored in PBS to assess  $\mu$ TENN survival and host/ $\mu$ TENN synaptic integration ( $n = 6$ ).  
295 Histology was performed via traditional immunohistology (IHC) and the Visikol clearing method to  
296 resolve thicker tissue sections where appropriate.  
297

298  
299 For traditional IHC, brains were sagittally blocked and cut in 40  $\mu$ m slices for cryosectioning. For frozen  
300 sections, slices were air-dried for 30 minutes, twice treated with ethanol for three minutes, and  
301 rehydrated in PBS twice for three minutes. Sections were blocked with 5% normal horse serum (ABC  
302 Universal Kit, Vector Labs, cat #PK-6200) in 0.1% Triton-x/PBS for 30-45 minutes. Primary antibodies  
303 were applied to the sections in 2% normal horse serum/Optimax buffer for two hours at room  
304 temperature. Primary antibodies were chicken anti-MAP2 (1:1000), mouse anti-Tuj1 (1:1000), and  
305 mouse anti-synapsin (1:1000). Sections were rinsed with PBS three times for five minutes, after which  
306 secondary antibodies (1:1000) were applied in 2% normal horse serum/PBS for one hour at room  
307 temperature. Sections were counterstained with DNA-specific fluorescent Hoechst 33342 for ten  
308 minutes and then rinsed with PBS. After immunostaining, slides were mounted on glass coverslips with  
309 Fluoromount-G mounting media.  
310

311 In the Visikol method, brains were glued to a vibratome mounting block directly in front of a 5% low  
312 EEO agarose post (Sigma A-6103) and placed in PBS surrounded by ice. The brain was cut in 100-200  
313  $\mu$ m coronal segments with a Leica VT-1000S vibratome until the  $\mu$ TENN implantation site was  
314 approximately 1 mm from the cutting face. Subsequently a single 2 mm section containing the  
315 microTENN was cut and placed in PBS (frequency setting: 9, speed: 10). The 2 mm brain section was  
316 treated at 4°C with 50%, 70%, and 100% tert-butanol, each for 20 minutes. After the ascending tert-  
317 butanol steps, the tissue was removed and placed on a kimwipe to carefully remove any excess  
318 reagent. Visikol Histo-1 was applied to the sample for 2 hours at 4°C followed by Visikol Histo-2 for 2  
319 hours at 4°C to complete the clearing process. The sample was placed in a petri dish and a  
320 hydrophobic well was drawn around the tissue. Fresh Visikol Histo-2 was applied to completely  
321 submerge the tissue, which was then covered by a glass coverslip.  
322

323 Coverslips containing brain slices were imaged on a Nikon A1RMP+ multiphoton confocal microscope  
324 paired with NIS Elements AR 4.60.00 and a 16x immersion objective. A 960-nm laser was used to  
325 visualize the  $\mu$ TENN containing neurons expressing GFP/GCaMP.  
326

### 327 **Data Availability**

328 The data that support the findings of this study are available from the corresponding author upon  
329 reasonable request.  
330

## 331 **Results**

332 The objectives of our current efforts were threefold: (1) to reproducibly fabricate “living electrode”  
333  $\mu$ TENNs and characterize their growth, architecture, viability, phenotype, and synaptic functionality, (2)  
334 to demonstrate the ability to control and monitor  $\mu$ TENNs via light, and (3) to determine whether  
335 transplanted  $\mu$ TENN neurons survive *in vivo* and remain viable and active in the host cortex.  
336

337  
338  
339  
340  
341  
342  
343  
344  
345  
346  
347  
348  
349  
350  
351  
352  
353  
354  
355  
356  
357  
358  
359  
360  
361  
362  
363  
364  
365  
366  
367  
368  
369  
370

## Fabrication and Axonal Outgrowth

In earlier work,  $\mu$ TENNs were seeded with single cell suspensions of primary cortical neurons, which in many cases formed clusters at random sites throughout the microcolumn interior (Figure 1). Current-generation  $\mu$ TENNs were built using cortical aggregates that have been formed prior to plating in the microcolumns, allowing for greater control and reproducibility of the desired cytoarchitecture of discrete somatic and axonal zones (Figure 1). This reproducibility lends itself to consistently creating the desired cytoarchitecture *in vitro*, a necessary step in applying them as living electrodes. Aggregate  $\mu$ TENNs were plated with approximately 8,000-10,000 neurons per aggregate, with microcolumn lengths ranging from 2mm to 9mm; further, both unidirectional (with one aggregate) and bidirectional (with two aggregates at either end)  $\mu$ TENNs were plated with different lengths. Healthy axonal outgrowth was found across all aggregate  $\mu$ TENNs along the ECM core within the first few days *in vitro* through analysis of phase microscopy images (Figure 2). All aggregate  $\mu$ TENNs exhibited rapid axonal growth rates, peaking at  $1101.8 \pm 81.1$  microns/day within the  $LE_{BI,9}$  group. In general, aggregate  $\mu$ TENNs displayed maximal growth at 3 days *in vitro* (DIV); exceptions included  $LE_{BI,8}$  and  $LE_{UNI,5}$ , where the fastest growth was observed at 5 DIV, and  $LE_{UNI,2}$ , with an average maximum growth rate of  $580 \pm 43.9$  microns/day at 1 DIV (Figure 2F, Table 1). Comparatively, dissociated  $\mu$ TENNs exhibited a peak growth rate of  $61.7 \pm 5$  microns/day at 1 DIV, representing a nearly 17-fold reduction relative to the aggregate  $\mu$ TENNs within the  $LE_{BI,9}$  group (Figure 2F, Table 1). Planar control cultures exhibited an average growth rate of  $38.1 \pm 19.4$  microns/day from 1 to 3 DIV and  $39.1 \pm 20.6$  microns/day from 3 to 5 DIV, after which single neurites could not be identified (Table 1). The two planar growth rates did not differ significantly, yielding a cumulative average growth rate of  $38.6 \pm 20.0$  microns/day.

One-way ANOVA of the average maximum growth rate identified a significant main effect of the LE group (F-statistic = 14.1,  $p < 0.0001$ ). Subsequent Bonferroni analysis on pairwise comparisons revealed that the average maximum growth rates of bidirectional  $\mu$ TENNs ranging from 7 to 9 mm in length ( $LE_{BI,7}$ ,  $LE_{BI,9}$ ) were statistically higher than those 2 to 3 mm in length ( $LE_{BI,2}$ ,  $LE_{BI,3}$ ) ( $p < 0.001$ ); additionally, the maximum growth rate of  $LE_{BI,9}$  was found statistically higher than that of  $LE_{UNI,2}$  ( $p < 0.01$ ) and  $LE_{UNI,5}$  ( $p < 0.05$ ) (Figure 2). ANOVA of the minimum growth rate did not detect any differences across LE groups (F-statistic = 1.17,  $p = 0.332$ ), while ANOVA of the average crossing time (F-statistic = 12.99,  $p < 0.0001$ ) and Bonferroni post-hoc analysis showed that  $LE_{BI,7}$  and  $LE_{BI,9}$  axons crossed the length of the microcolumn later than those of  $LE_{UNI,2}$ ,  $LE_{BI,2}$ ,  $LE_{BI,3}$ , and  $LE_{BI,5}$  (Figure 2E).  $\mu$ TENNs within  $LE_{UNI,5}$  did not, on average, fully span the construct length by 10 DIV (Figure 2, Table 1).

| Growth Rates  | $LE_{UNI,2}$   | $LE_{BI,2}$    | $LE_{BI,3}$    | $LE_{UNI,5}$   | $LE_{BI,5}$    | $LE_{BI,7}$    | $LE_{BI,9}$     | $LE_{DISS,2}$    | Planar          |
|---------------|----------------|----------------|----------------|----------------|----------------|----------------|-----------------|------------------|-----------------|
| Initial       | $547 \pm 73.2$ | $378 \pm 51.9$ | $345 \pm 35.4$ | $525 \pm 21.9$ | $535 \pm 62.9$ | $472 \pm 66.9$ | $513 \pm 100.7$ | $61.7 \pm 5.01$  | $38.1 \pm 19.4$ |
| Maximum       | $580 \pm 43.9$ | $453 \pm 33.8$ | $559 \pm 28.7$ | $656 \pm 88.3$ | $838 \pm 43.2$ | $894 \pm 79.2$ | $1102 \pm 81.1$ | $61.7 \pm 5.01$  | $39.1 \pm 20.6$ |
| Minimum       | $430 \pm 73.0$ | $248 \pm 22.7$ | $324 \pm 38.0$ | $202 \pm 74.9$ | $395 \pm 56.4$ | $336 \pm 57.4$ | $313 \pm 68.3$  | $-5.37 \pm 7.50$ | $38.1 \pm 19.4$ |
| Crossing Time | 4.33           | 3.60           | 3.67           | NA             | 4.35           | 6.29           | 8.0             | N/A              | N/A             |

Table 1:  $\mu$ TENN Growth Characterization. Data presented as mean  $\pm$  s.e.m. in units of microns/day (Initial, Maximum, and Minimum Growth Rates) and days *in vitro* (Crossing Time). LE subscripts indicate unidirectional (UNI), bidirectional (BI), or dissociated (DISS)  $\mu$ TENNs and the microcolumn length in millimeters.

371  
372  
373  
374  
375  
376  
377  
378  
379  
380  
381

## $\mu$ TENN Viability

Neuronal survival was quantified via live/dead staining and confocal microscopy for short unidirectional and short bidirectional  $\mu$ TENNs at 10 and 28 DIV (Figure 3). Age-matched planar cultures served as controls. Percent viability was defined as the ratio of the summed area of calcein-AM-positive cells to that of all stained cells (i.e. both calcein-AM<sup>+</sup> and ethidium homodimer<sup>+</sup> cells). Neuronal survival in  $\mu$ TENNs was observed to persist up to at least 28 DIV, with further demonstration of survival out to 40 DIV (Figure 3). ANOVA showed that although the DIV was a significant main effect (F-statistic = 32.21,



382  $p < 0.0001$ ), the LE/culture group was not a significant factor ( $p > 0.84$ ). The interaction effect was  
383 significant ( $p < 0.01$ ), so Bonferroni analysis was used to compare groups at each time point (Figure  
384 3G). Viability of planar cultures at 28 DIV (53.6%) was found statistically lower than that of LE<sub>UNI</sub>  
385 (80.3%) ( $p < 0.05$ ), LE<sub>BI</sub> (84.8%) ( $p < 0.001$ ), and planar cultures (97.7%) ( $p < 0.0001$ ) at 10 DIV.  
386 Moreover, planar culture viability at 10 DIV surpassed those of both LE<sub>UNI</sub> (68.1%) and LE<sub>BI</sub> (69.0%) at  
387 28 DIV ( $p < 0.01$ ). Overall, planar cultures exhibited a 45% decline in viability from 10 to 28 DIV, while  
388 LE<sub>UNI</sub> and LE<sub>BI</sub> showed a 15.2% and 18.6% drop over time, respectively (Figure 3).

### 389 **$\mu$ TENN Architecture and Synaptogenesis**

390 To characterize  $\mu$ TENN architecture, bidirectional  $\mu$ TENNs were either labeled with GFP and mCherry  
391 and imaged over time or fixed and immunolabeled at set timepoints to identify cell nuclei, axons, and  
392 synapses (Figure 4). Confocal images of GFP/mCherry  $\mu$ TENNs revealed that upon making contact  
393 with opposing axons, projections continued to grow along each other towards the opposing aggregate,  
394 confirming physical interaction and integration between the two neuronal populations (Figure 4).  
395 Immunolabeling revealed that neuronal somata were localized almost exclusively to the aggregates,  
396 which were spanned by long axons, as indicated with Tuj-1 (Figure 4H); axons and dendrites were also  
397 found within the aggregates from intra-aggregate connections, presumably formed upon or shortly after  
398 plating. Synapse presence was qualitatively assessed using the sum area of synapsin<sup>+</sup> puncta across  
399 the specified timepoints. A modest distribution of synapsin within  $\mu$ TENN aggregates was observed, as  
400 well as an increase in synapsin expression within the lumen of the microcolumns, suggesting that  
401 neurons within bidirectional  $\mu$ TENNs synaptically integrate and therefore have the capacity to  
402 communicate between aggregates.  
403

### 404 **Calcium Imaging and Optical Stimulation**

405 Bidirectional  $\mu$ TENNs expressing the calcium reporter GCaMP6f exhibited spontaneous oscillations in  
406 the delta band (1-5 Hz) in the absence of external stimulation, with the synchronicity of oscillation  
407 between aggregates suggesting the potential formation of synaptic networks. Moreover, the  
408 introduction of the NMDA and AMPA receptor antagonists D-APV and CNQX to media containing  
409 bidirectional  $\mu$ TENNs reversibly abolished endogenous activity as measured by the calcium reporter  
410 GCaMP6f (data not shown), indicating that the calcium transients observed may reflect action potential  
411 firing due to synaptic transmission. Bidirectional  $\mu$ TENNs were also engineered to enable light-based  
412 stimulation and concurrent calcium imaging *in vitro* by transducing one aggregate with ChR2 and the  
413 opposing aggregate with RCaMP. Upon illumination of ChR2<sup>+</sup> (input) aggregates with 465nm light  
414 (stimulation wavelength of ChR2), the opposing RCaMP<sup>+</sup> (output) aggregates exhibited timed changes  
415 in fluorescence intensity in response. As a negative control, the input aggregate was exposed to 620nm  
416 light (off-target wavelength), revealing no readily observable responses; the mean peak  $\Delta F/F_0$  of the  
417 output aggregate was significantly greater under 465nm stimulation than 620nm stimulation at  
418  $634\text{mW}/\text{mm}^2$  ( $p < 0.05$ ). Collectively, these findings suggest that the changes in  $\Delta F/F_0$  under 465nm  
419 stimulation reflected synaptically mediated firing of neurons in the output aggregate in response to light-  
420 based activation of neurons within the input aggregate. Although there was high variability in  $\Delta F/F_0$   
421 between  $\mu$ TENNs, the percent change relative to baseline fluorescence due to optical stimulation could  
422 be reproducibly distinguished from endogenous activity across all the  $\mu$ TENNs studied and the average  
423 maximum  $\Delta F/F_0$  positively correlated with the stimulation intensity (Figure 5). Overall, these results  
424 suggest that light-based stimulation of the input aggregate resulted in controllable signal propagation  
425 and modulation of activity in the output aggregate.  
426

### 427 **Implantation and Intravital Calcium Imaging**

428  $\mu$ TENNs – fabricated as described above and transduced to express GCaMP6 – were implanted as a  
429 proof-of-concept for living electrode survival, integration, and function. One week and one month-post  
430 injection in the rodent brain, constructs were found to have survived and maintained the preformed  
431 somatic-axonal architecture, with cell bodies predominantly localized to one or both microcolumn  
432

433 terminals and spanned by axonal tracts (Figure 6). Large, dense clusters of GCaMP<sup>+</sup> cell bodies  
434 (aggregates) were found at the dorsal and ventral regions of implantation, with axons and dendrites  
435 within the lumen spanning the two locations (Figure 6). There was also significant neurite outgrowth  
436 from the ventral end of the living electrode, with structural evidence of synapse formation with host  
437 neurons (Figure 6). In some cases, there was also neuronal migration up to several millimeters from the  
438 ventral implant location, although the presence and extent of migration varied across implants.  
439 Multiphoton imaging revealed GCaMP-positive  $\mu$ TENN neurons in V1 at both 5 and 10 days post-  
440 implant (Figure 7). The breathing of the anesthetized animal was controlled via monitoring and  
441 controlled isoflurane delivery, and changes in GCaMP fluorescence intensity due to breathing artifact  
442 were readily identified within the FFT of the time-lapse recordings as a ~0.5-0.7 Hz peak (Figure 7).  
443 Non-artifact changes in GCaMP intensity were present in the delta band (1-5 Hz), indicating  $\mu$ TENN  
444 survival and neuronal activity (Figure 7). Putative activity was also present at frequencies below 1 Hz,  
445 within the reported range reported for slow-wave cortical activity under anesthesia and during sleep<sup>18,19</sup>.  
446 Calcium recordings of  $\mu$ TENNs at both 5 and 10 days post-implant reflected those of non-implanted  
447  $\mu$ TENNs at 10 DIV, which was also dominated by low frequency activity in the 1-5 Hz range (as shown  
448 in Figure 5).

449

450

### Discussion

451

452

453

454

455

456

457

458

459

460

461

462

463

464

465

466

467

468

469

470

471

472

473

474

475

476

477

478

479

480

481

482

483

Microelectrodes—the current gold standard for recordings—have been deployed successfully on the order of months, and less frequently years, in rodents, non-human primates, and human patients<sup>1,20–22</sup>. However, microelectrode-based BCIs generally succumb to a complex combination of abiotic and biological factors, including neuronal loss/migration, gliosis, biofouling, electrode movement, and/or mechanical failure – which impede stability, specificity, and clinical deployment<sup>1–5,23</sup>. Optogenetic strategies for neuromodulation permit more selective stimulation, but must address formidable challenges such as restricting the vector of interest to targeted cells, addressing the scattering and limited tissue penetration of light, and activating transduced cells without overheating brain tissue<sup>24–27</sup>. Efforts to minimize inflammation have yielded more compliant electrodes and electrode coatings/co-factors; however, the chronic foreign body response, consequent signal drop, and increase in stimulation thresholds continue to affect many current systems.

As an alternative to conventional microelectrodes and/or optogenetics strategies,  $\mu$ TENNs as living electrodes may present a neuromodulation/recording platform with improved selectivity and longevity. By being fully fabricated *in vitro*,  $\mu$ TENNs leverage advantages of optogenetics while (1) avoiding any inherent risks of introducing active viruses *in vivo*, (2) restricting viral expression to the  $\mu$ TENN neurons only, and (3) leveraging well-established stereotactic neurosurgical techniques. The microcolumn size may be minimized to reduce the microinjection footprint, while its material properties (e.g. stiffness) and potential co-factors (e.g. anti-inflammatory/growth factor release) may be tailored against any subsequent foreign body response. Moreover, while the constructs in this study were predominantly glutamatergic,  $\mu$ TENNs may be seeded with other neuronal subtypes for various applications (e.g. inhibitory or dopaminergic neurons) to enable more targeted integration based on the synaptogenetic behaviors of the subtype. Finally, as the  $\mu$ TENN-brain interface is synaptic, living electrodes may potentially remain stable in the brain for extended periods of time. Given the potential benefits of the  $\mu$ TENN paradigm, the work described here represents a critical foundation in developing these implantable, engineered neural networks into a viable neural interface. Indeed, the biofabrication of phenotypically-controlled, fully-implantable axon-based living electrodes may provide a useful tool for the neuroscience community to probe and modulate deep neural circuitry based on biological specificity provided by natural, synaptic inputs while being accessible on the brain surface for optical read-out/control.

A key objective of the current work was the development of advanced methodology for the biofabrication of fully implantable, three-dimensional (3D) cylindrical microtissue replicating key

484 neuroanatomical features: discrete populations(s) of phenotypically controlled neurons spanned by  
485 dense bundles of longitudinally aligned axonal tracts. Remarkably, we identified biofabrication  
486 techniques that not only consistently created our desired cytoarchitecture, but also resulted in the  
487 emergence of accelerated axonal outgrowth and improved neuronal survival versus traditional, planar  
488 cultures. In particular, we found that neuronal aggregate-based biofabrication allowed for more  
489 standardized construct architecture and repeatable studies compared to single-cell suspensions.  
490 Notably, we found that aggregate-based  $\mu$ TENNs exhibited faster axonal growth and greater total  
491 axonal lengths than their dissociated counterparts. The observed growth rates for dissociated  $\mu$ TENNs  
492 were similar to those in planar cultures, which averaged nearly 40  $\mu\text{m}/\text{day}$  over the first 3 days (Figure  
493 2). This falls within the growth reported in literature for cortical axons, which have reached lengths of up  
494 to 100-1000  $\mu\text{m}$  over 3 days in planar cultures<sup>28,29</sup>. However, the peak axonal growth rates that were  
495 measured from aggregates greatly exceeded those in planar counterparts and dissociated  $\mu$ TENNs by  
496 2 orders of magnitude, or over 1000  $\mu\text{m}/\text{day}$ . Although further investigation is needed, we have  
497 identified a few potential causes of this significant benchmark. First, the restriction of axonal outgrowth  
498 to the microcolumn interior resulted in the formation of “bundles” of axons from the aggregates, which  
499 may be directionally self-reinforcing and accelerate linear extension. Second, the lack of synaptic  
500 targets within the microcolumn may reduce axon branching between aggregates, which would  
501 otherwise slow growth cone movement<sup>28,30–33</sup>. Further, although longer  $\mu$ TENNs generally exhibited  
502 faster growth than shorter ones, initial growth rates did not vary significantly across different lengths.  
503 Thus greater separation between the aggregates may be necessary to establish either sufficient  
504 chemotactic gradients or a “ramp up” of growth machinery, such that maximal growth rates are only  
505 reached when targets are several mm away. Finally, axon growth was mediated, if not accelerated, by  
506 the collagen-laminin ECM, as its constituents are known to support axonal growth<sup>34</sup>. Indeed, aggregate  
507  $\mu$ TENNs created without ECM had limited neurite outgrowth and did not develop inter-aggregate  
508 connections (data not shown).

509  
510  $\mu$ TENN neuronal viability was shown to persist for up to 40 DIV, suggesting their potential for use in  
511 long-term *in vitro* studies. Interestingly, the decline in viability from 10 to 28 DIV was lower for both  
512 unidirectional and bidirectional  $\mu$ TENNs than for planar cultures. While the cause of this improved  
513 survival potential has not been fully investigated, established work suggests that neurons exhibit better  
514 growth and survival in 3D environments, which more accurately approximate conditions *in vivo*<sup>35</sup>.  
515 Similarly, the anatomically inspired 3D microstructure of the neuronal aggregates and axonal bundles  
516 may enable neurons to better self-regulate and remain healthy compared to 2D cultures.

517  
518 In addition to rapid growth and improved survival, a key outcome was the determination of functional  
519 connectivity across the neuronal populations mediated by the engineered axonal tracts. Here, structural  
520 evidence of neuritic and synaptic integration was visualized as early as 4 DIV within the microcolumns.  
521 As the primary points of contact and communication between neurons, synapses are often used to  
522 determine the functional maturity of neuronal cultures<sup>36,37</sup>. Synapsin<sup>+</sup> puncta were observed to increase  
523 between 4 DIV and 28 DIV, suggesting that  $\mu$ TENN neurons form functional connections soon after  
524 plating which mature and expand over time, consistent with literature for planar cortical cultures<sup>37</sup>.  
525 Future network connectivity studies may more fully characterize the development and distribution of  
526 intra- versus inter-aggregate synapses; however, it is likely that intra-aggregate synapses initially  
527 dominate the total synapse population before axons span the aggregates and enable inter-aggregate  
528 synapses to form. These analyses would build on the aggregate-specific labeling achieved here to  
529 distinguish structures from either aggregate (Figure 4). Overall, these results indicate that  $\mu$ TENNs are  
530 capable of quickly and consistently forming the desired  $\mu$ TENN architecture – important for the  
531 biofabrication and scale-up of experimentally useful constructs – which is maintained over weeks *in*  
532 *vitro*. Moreover, the  $\mu$ TENNs’ structure may make them an ideal system for studying neuronal growth,  
533 maturation, and network dynamics *in vitro*, with characteristics approximating the 3D architecture of  
534 connectome-spanning structures in the mammalian brain more closely than planar cultures<sup>35</sup>.

535

536 Initially, we measured spontaneous activity in and across the aggregates (Figure 5, Supplemental  
537 Movies 1 & 2), which consisted primarily of delta oscillations (1-5 Hz). Concurrent network analyses  
538 have shown that  $\mu$ TENNs *in vitro* exhibit inter-aggregate synchronicity within the delta band<sup>38</sup>. The  
539 introduction of glutamatergic receptor blockers and subsequent suppression of GCaMP<sup>+</sup> activity  
540 implicate synaptic transmission as the primary contributor to changes in reporter fluorescence. Optical  
541 stimulation and recordings of evoked activity across aggregates further demonstrate the presence of  
542 functional axonal tracts and synaptic-mediated integration across two aggregate populations. These  
543 important steps validated the functionality and long-distance transmission across the axonal tracts  
544 within the microcolumns and, crucially, demonstrate the ability of these constructs to serve as an “all  
545 optical” input-output platform for experimental use *in vitro* and/or for circuit modulation *in vivo*. Indeed,  
546 post-transplant into the rat cortex, we found that this activity persisted, along with slow-wave activity  
547 recorded below 1 Hz. Slow-wave oscillations have been recorded under anesthesia and during slow-  
548 wave sleep, as well as in cortical neuronal cultures *in vitro*<sup>18,19</sup>. Whether the <1 Hz activity observed  
549 within the  $\mu$ TENNs reflects cortical activity is unknown at present and will be further determined through  
550 continued intravital, functional, and histological analyses at longer timepoints. Combined with the  
551 presented histology, there is strong evidence that  $\mu$ TENNs survive post-transplant and form putative  
552 synapses with the cortex, although we observed significant overgrowth and integration with a subset of  
553 our transplants. As such, controllability over neuronal migration and the targeting of synaptic integration  
554 remains an ongoing design challenge that will need to be addressed to ensure proper function. This  
555 may be done by controlling neuronal subtype as discussed, or by otherwise manipulating the transplant  
556 environment to promote more targeted integration, e.g. introducing or promoting expression of trophic  
557 factors implicated in axonal guidance and/or synaptic pruning during development<sup>39,40</sup>. Potential  
558 physical targeting methods include a porous membrane at the ventral terminal to restrict neuronal  
559 migration while permitting axonal projections between the  $\mu$ TENN and host brain.

560

561 In summary, we have created so-called living electrodes – cylindrical hydrogel-encapsulated neuronal  
562 populations linked by functional axonal tracts – and demonstrated their biofabrication, functional  
563 validation, targeted delivery, and survival and integration post-transplant. These milestones lay the  
564 groundwork for more in-depth investigations of the translational utility of the  $\mu$ TENNs following targeted  
565 transplant in the cerebral cortex or other anatomical targets. Future work will assess the ability of  
566 transplanted  $\mu$ TENNs as an experimental tool to modulate (input) and/or record (output) brain activity  
567 as a neural interface (Figure 1). For inputs, unidirectional, optogenetically-active  $\mu$ TENNs may bypass  
568 the light scattering and limited penetration depth of conventional optogenetic methods by relaying light  
569 stimulation at the cortical surface into synaptic inputs to the desired target. For outputs, bidirectional  
570  $\mu$ TENNs may be transduced with GCaMP<sup>+</sup> or similar reporters and transplanted. Upon forming  
571 synapses with host neurons, GCaMP<sup>+</sup>  $\mu$ TENNs may be used to monitor neuronal activity deeper in the  
572 brain, providing actionable representations of deeper neural signals to the brain surface. Taken  
573 together, these results serve as an early proof-of-concept for  $\mu$ TENNs as a platform for biologically-  
574 based neuromodulation. Through optogenetic and tissue-engineering techniques, we have advanced  
575 the development of preformed, implantable neural networks as a potentially long-term neural interface  
576 at the intersection of neuroscience and engineering.

577

578

#### 579 **Acknowledgements:**

580

581 **Funding:** Financial support was primarily provided by the National Institutes of Health [BRAIN Initiative  
582 U01-NS094340 (Cullen), T32-NS043126 (Harris) & T32-NS091006 (Struzyna)] and the National  
583 Science Foundation [Graduate Research Fellowship DGE-1321851 (Adewole)], with additional support  
584 from the Penn Medicine Neuroscience Center (Cullen), American Association of Neurological Surgeons  
585 and Congress of Neurological Surgeons [Codman Fellowship in Neurotrauma and Critical Care

586 (Petrov)], and the Department of Veterans Affairs [Merit Review I01-BX003748 (Cullen), Merit Review  
587 I01-RX001097 (Cullen), Career Development Award #IK2-RX001479 (Wolf) & Career Development  
588 Award #IK2-RX002013 (Chen)]. Any opinion, findings, and conclusions or recommendations expressed  
589 in this material are those of the authors(s) and do not necessarily reflect the views of the National  
590 Institutes of Health, National Science Foundation, or Department of Veterans Affairs.

591

592 **Author Contributions:**

593 Conceptualization: D.K.C., J.A.W., M.D.S., H.I.C.; Methodology: D.K.C., D.O.A., L.A.S., J.P.H., A.D.N.,  
594 J.C.B., D.P., H.I.C., J.A.W.; Formal Analysis: D.O.A.; Investigation: D.O.A., J.C.B.; Resources: R.H.K.;  
595 Visualization: D.O.A.; Writing – Original Draft: D.O.A.; Writing – Review & Editing: D.O.A., D.K.C.,  
596 L.A.S., J.P.H., A.D.N., J.C.B., D.P., R.H.K., H.I.C., J.A.W., M.D.S.; Supervision: D.K.C., J.A.W., M.D.S.,  
597 R.H.K., H.I.C.; Project Administration: D.K.C.; Funding Acquisition (primary): D.K.C.

598

599

600

601 **References**

- 602 1. Adewole, D. O., Serruya, M. D., Harris, J. P., Burrell, J. C., Petrov, D., Chen, H. I., Wolf, J. A. &  
603 Cullen, D. K. The evolution of neuroprosthetic interfaces. *Crit. Rev. Biomed. Eng.* **44**, 123–152  
604 (2016).
- 605 2. Tresco, P. A. & Winslow, B. D. The challenge of integrating devices into the central nervous  
606 system. *Crit. Rev. Biomed. Eng.* **39**, 29–44 (2011).
- 607 3. Harris, J. P. & Tyler, D. J. Biological, mechanical, and technological considerations affecting the  
608 longevity of intracortical electrode recordings. *Crit. Rev. Biomed. Eng.* **41**, 435–56 (2013).
- 609 4. Grill, W. M., Norman, S. E. & Bellamkonda, R. V. Implanted neural interfaces: biochallenges and  
610 engineered solutions. *Annu. Rev. Biomed. Eng.* **11**, 1–24 (2009).
- 611 5. Polikov, V. S., Tresco, P. a. & Reichert, W. M. Response of brain tissue to chronically implanted  
612 neural electrodes. *J. Neurosci. Methods* **148**, 1–18 (2005).
- 613 6. Cogan, S. F. Neural stimulation and recording electrodes. *Annu. Rev. Biomed. Eng.* **10**, 275–309  
614 (2008).
- 615 7. Aravanis, A. M., Wang, L.-P., Zhang, F., Meltzer, L. a, Mogri, M. Z., Schneider, M. B. &  
616 Deisseroth, K. An optical neural interface: in vivo control of rodent motor cortex with integrated  
617 fiberoptic and optogenetic technology. *J. Neural Eng.* **4**, S143–S156 (2007).
- 618 8. Pashaie, R., Anikeeva, P., Lee, J. H., Prakash, R., Yizhar, O., Prigge, M., Chander, D., Richner,  
619 T. J. & Williams, J. Optogenetic brain interfaces. *IEEE Rev. Biomed. Eng.* **7**, 3–30 (2014).
- 620 9. Fan, B. & Li, W. Miniaturized optogenetic neural implants: a review. *Lab Chip* **15**, 3838–55  
621 (2015).
- 622 10. Harris, J. P., Struzyna, L. A., Murphy, P. L., Adewole, D. O., Kuo, E. & Cullen, D. K. Advanced  
623 biomaterial strategies to transplant preformed micro-tissue engineered neural networks into the  
624 brain. *J. Neural Eng.* **13**, 016019 (2016).
- 625 11. Struzyna, L. A., Wolf, J. A., Mietus, C. J., Chen, I. H., Smith, D. H., Cullen, D. K., Chen, H. I.,  
626 Smith, D. H., Cullen, D. K., Adewole, D. O., Chen, H. I., Smith, D. H. & Cullen, D. K. Rebuilding  
627 brain circuitry with living micro-tissue engineered neural networks. *Tissue Eng.* **21**, 2744–2756  
628 (2015).
- 629 12. Struzyna, L. A., Harris, J. P., Katiyar, K. S., Chen, H. I. & Cullen, D. K. Restoring nervous system  
630 structure and function using tissue engineered living scaffolds. *Neural Regen. Res.* **10**, 679–685  
631 (2015).
- 632 13. Struzyna, L. A., Adewole, D. O., Gordián-Vélez, W. J., Grovola, M. R., Burrell, J. C., Katiyar, K.  
633 S., Petrov, D., Harris, J. P. & Cullen, D. K. Anatomically inspired three-dimensional micro-tissue  
634 engineered neural networks for nervous system reconstruction, modulation, and modeling. *J.*  
635 *Vis. Exp. JoVE* **2017**, (2017).
- 636 14. Ungrin, M. D., Joshi, C., Nica, A., Bauwens, C. & Zandstra, P. W. Reproducible, ultra high-  
637 throughput formation of multicellular organization from single cell suspension-derived human  
638 embryonic stem cell aggregates. *PLoS One* **3**, (2008).
- 639 15. Akerboom, J., Carreras Calderón, N., Tian, L., Wabnig, S., Prigge, M., Tolö, J., Gordus, A.,  
640 Orger, M. B., Severi, K. E., Macklin, J. J., Patel, R., Pulver, S. R., Wardill, T. J., Fischer, E.,  
641 Schüler, C., Chen, T., Sarkisyan, K. S., Marvin, J. S., Bargmann, C. I., Kim, D. S., Kügler, S.,  
642 Lagnado, L., Hegemann, P., Gottschalk, A., Schreiter, E. R. & Looger, L. L. Genetically encoded  
643 calcium indicators for multi-color neural activity imaging and combination with optogenetics.  
644 *Front. Mol. Neurosci.* **6**, 2 (2013).

- 645 16. Patel, T. P., Man, K., Firestein, B. L. & Meaney, D. F. Automated quantification of neuronal  
646 networks and single-cell calcium dynamics using calcium imaging. *J. Neurosci. Methods* **243**,  
647 26–38 (2015).
- 648 17. Mank, M., Santos, A. F., Drenth, S., Mrcic-Flogel, T. D., Hofer, S. B., Stein, V., Hendel, T.,  
649 Reiff, D. F., Levelt, C., Borst, A., Bonhoeffer, T., Hübener, M. & Griesbeck, O. A genetically  
650 encoded calcium indicator for chronic in vivo two-photon imaging. *Nat. Methods* **5**, 805–811  
651 (2008).
- 652 18. Franken, P., Dijk, D. J., Tobler, I. & Borbely, A. A. Sleep-deprivation in rats - effects on eeg  
653 power spectra, vigilance states, and cortical temperature. *Am. J. Physiol.* **261**, R198–R208  
654 (1991).
- 655 19. Steriade, M., Nuñez, a & Amzica, F. A novel slow (< 1 Hz) oscillation of neocortical neurons in  
656 vivo: depolarizing and hyperpolarizing components. *J. Neurosci.* **13**, 3252–3265 (1993).
- 657 20. Hochberg, L. R., Serruya, M. D., Friehs, G. M., Mukand, J. a, Saleh, M., Caplan, A. H., Branner,  
658 A., Chen, D., Penn, R. D. & Donoghue, J. P. Neuronal ensemble control of prosthetic devices by  
659 a human with tetraplegia. *Nature* **442**, 164–171 (2006).
- 660 21. Gilja, V., Pandarinath, C., Blabe, C. H., Nuyujukian, P., Simeral, J. D., Sarma, A. a, Sorice, B. L.,  
661 Perge, J. a, Jarosiewicz, B., Hochberg, L. R., Shenoy, K. V & Henderson, J. M. Clinical  
662 translation of a high-performance neural prosthesis. *Nat. Med.* **21**, 6–8 (2015).
- 663 22. Krüger, J., Caruana, F., Volta, R. D. & Rizzolatti, G. Seven years of recording from monkey  
664 cortex with a chronically implanted multiple microelectrode. *Front. Neuroeng.* **3**, 6 (2010).
- 665 23. Prasad, A., Xue, Q.-S. S., Sankar, V., Nishida, T., Shaw, G., Streit, W. J. & Sanchez, J. C.  
666 Comprehensive characterization and failure modes of tungsten microwire arrays in chronic  
667 neural implants. *J. Neural Eng.* **9**, 056015 (2012).
- 668 24. Towne, C., Montgomery, K. L., Iyer, S. M., Deisseroth, K. & Delp, S. L. Optogenetic control of  
669 targeted peripheral axons in freely moving animals. *PLoS One* **8**, (2013).
- 670 25. Scharf, R., Tsunematsu, T., Mcalinden, N., Dawson, M. D., Sakata, S. & Mathieson, K. Depth-  
671 specific optogenetic control in vivo with a scalable, high-density µLED neural probe. *Nat. Publ. Gr.*  
672 **6**, 28381 (2016).
- 673 26. Llewellyn, M. E., Thompson, K. R., Deisseroth, K. & Delp, S. L. Orderly recruitment of motor  
674 units under optical control in vivo. *Nat. Med.* **16**, 1161–1165 (2010).
- 675 27. Favre-Bulle, I. a, Preece, D., Nieminen, T. a, Heap, L. a, Scott, E. K. & Rubinsztein-Dunlop, H.  
676 Scattering of sculpted light in intact brain tissue, with implications for optogenetics. *Sci. Rep.* **5**,  
677 11501 (2015).
- 678 28. Szebenyi, G., Callaway, J. L., Dent, E. W. & Kalil, K. Interstitial branches develop from active  
679 regions of the axon demarcated by the primary growth cone during pausing behaviors. *J.*  
680 *Neurosci.* **18**, 7930–7940 (1998).
- 681 29. Meberg, P. J. & Miller, M. W. Culturing hippocampal and cortical neurons. *Methods Cell Biol.* **71**,  
682 111–127 (2003).
- 683 30. Kalil, K., Szebenyi, G. & Dent, E. W. Common mechanisms underlying growth cone guidance  
684 and axon branching. *J. Neurobiol.* **44**, 145–158 (2000).
- 685 31. Halloran, M. C. & Kalil, K. Dynamic behaviors of growth cones extending in the corpus callosum  
686 of living cortical brain slices observed with video microscopy. *J. Neurosci.* **14**, 2161–2177 (1994).
- 687 32. Tang, F., Dent, E. W. & Kalil, K. Spontaneous calcium transients in developing cortical neurons

- 688 regulate axon outgrowth. *J. Neurosci.* **23**, 927–936 (2003).
- 689 33. Kalil, K., Li, L. & Hutchins, B. I. Signaling mechanisms in cortical axon growth, guidance, and  
690 branching. *Front. Neuroanat.* **5**, 1–15 (2011).
- 691 34. Goldberg, J. L. How does an axon grow? *Genes Dev.* **17**, 941–958 (2003).
- 692 35. LaPlaca, M. C., Vernekar, V. N., Shoemaker, J. T. & Cullen, D. K. Three-dimensional neuronal  
693 cultures. *Methods Bioeng. 3d Tissue Eng.* 187–204 (2010).
- 694 36. Harrill, J. A., Chen, H., Streifel, K. M., Yang, D., Mundy, W. R. & Lein, P. J. Ontogeny of  
695 biochemical, morphological and functional parameters of synaptogenesis in primary cultures of  
696 rat hippocampal and cortical neurons. *Mol. Brain* **8**, 10 (2015).
- 697 37. Cullen, D. K., Gilroy, M. E., Irons, H. R. & Laplaca, M. C. Synapse-to-neuron ratio is inversely  
698 related to neuronal density in mature neuronal cultures. *Brain Res.* **1359**, 44–55 (2010).
- 699 38. Dhobale, A. V., Adewole, D. O., Ho Wing Chan, A., Marinov, T., Serruya, M. D., Kraft, R. H. &  
700 Cullen, D. K. Assessing functional connectivity across three-dimensional tissue engineered  
701 axonal tracts using calcium fluorescence imaging. (Submitted for publication) (2018).
- 702 39. Vanderhaeghen, P. & Cheng, H.-J. Guidance molecules in axon pruning and cell death. *Cold*  
703 *Spring Harb. Perspect. Biol.* **2**, (2010).
- 704 40. Low, L. K. & Cheng, H.-J. Axon pruning: an essential step underlying the developmental  
705 plasticity of neuronal connections. *Philos. Trans. R. Soc. B Biol. Sci.* **361**, 1531–1544 (2006).

706

707

708



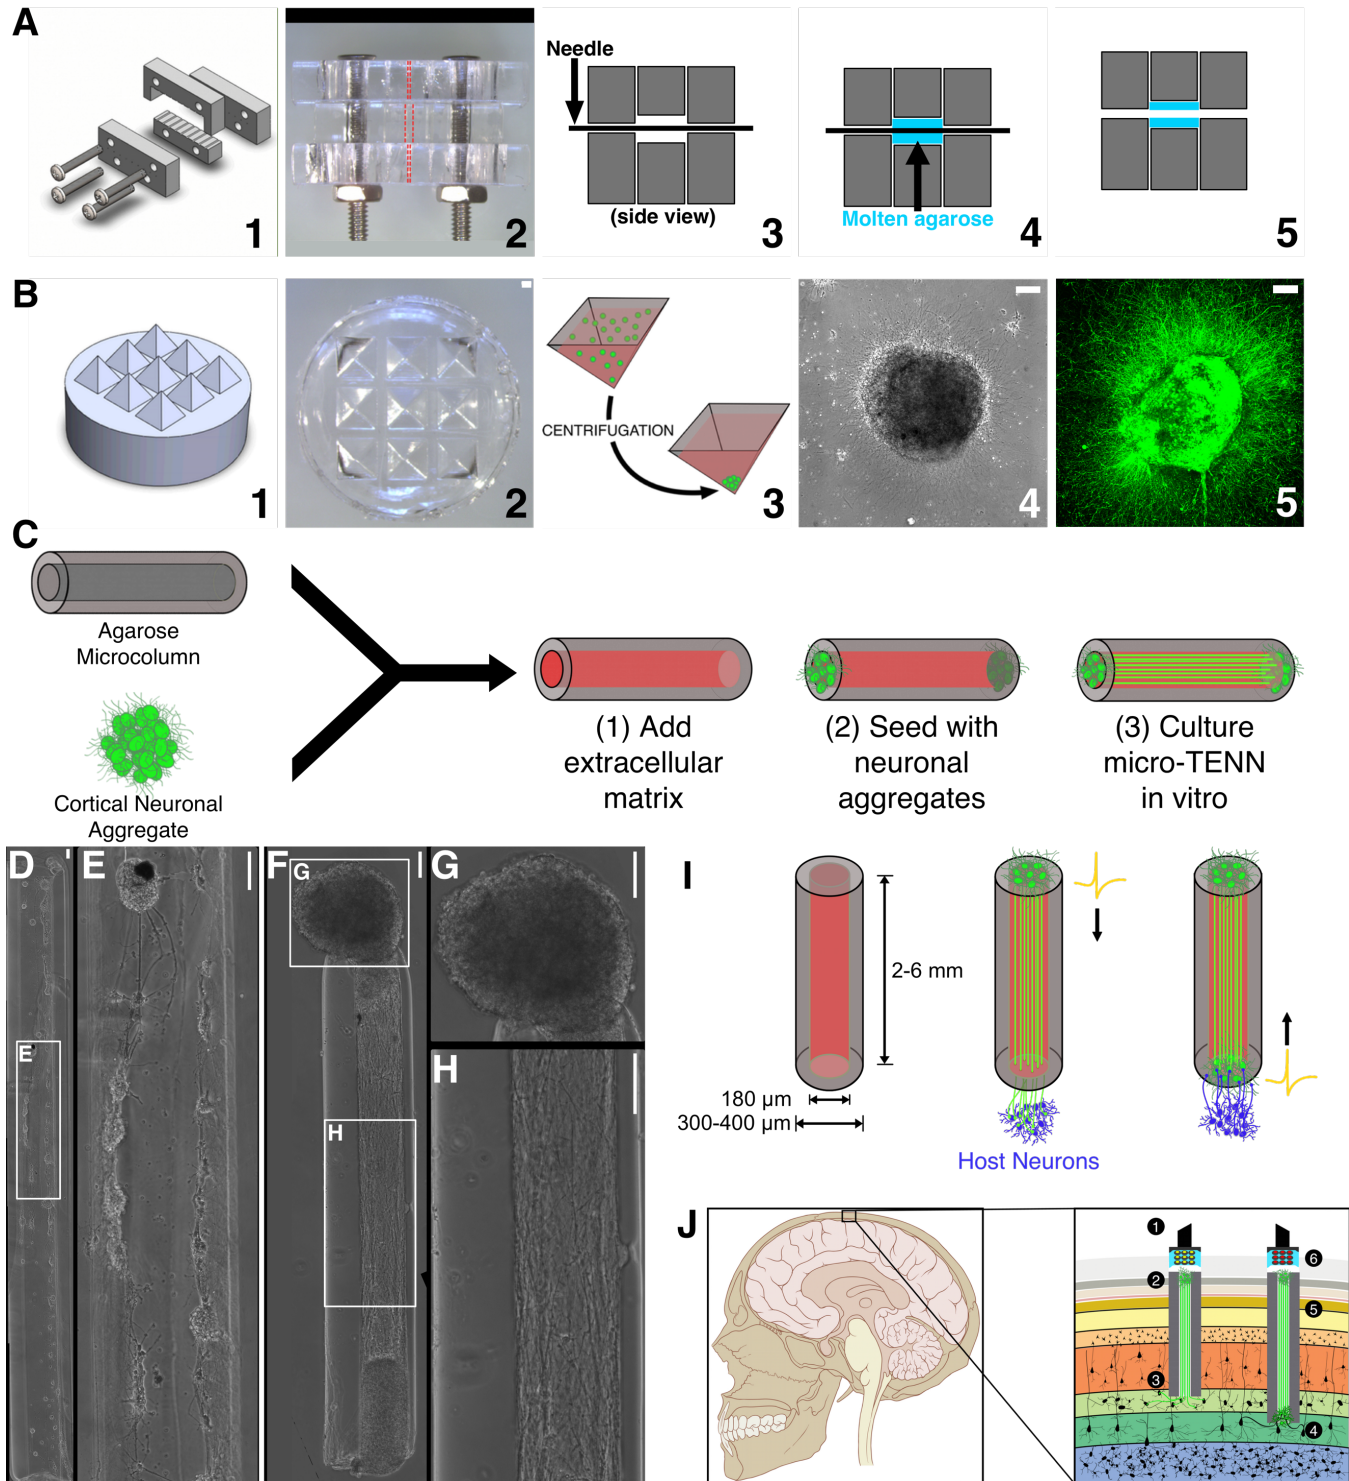

709 **Figure 1:  $\mu$ TENN Fabrication and Living Electrode Concept.**  $\mu$ TENNs comprise a hydrogel microcolumn,  
 710 living neuronal aggregates, and an extracellular matrix lumen. **(A) 1:** A customizable acrylic mold for generating  
 711 microcolumns. **2:** Top view of the mold (dashed lines represent outer and inner diameters). **3:** Needles of the  
 712 desired inner diameter are inserted into the mold. **4:** Molten agarose (blue) is introduced into the mold and cooled.  
 713 **5:** Microcolumns are removed after needle removal/mold disassembly. **(B) 1:** A 3D-printed mold for square  
 714 pyramidal wells. **2:** Pyramidal wells cast in PDMS. **3:** Dissociated neurons (green) forced into aggregates through  
 715 centrifugation. **4:** Phase image of an aggregate 24 hours after plating. **5:** Confocal reconstruction of aggregate at

716 72 hours, labeled with GFP. **(C)** Microcolumns (gray) are filled with an extracellular collagen-laminin matrix (red).  
717 Neuronal aggregates are then placed at one or both ends of the microcolumn and grown *in vitro*. **(D)**  $\mu$ TENNs  
718 were originally fabricated with dissociated neurons, yielding limited control over axonal growth and network  
719 formation **(E)**. Aggregate  $\mu$ TENNs **(F)** exhibit robust axonal growth and more controllable architecture, with  
720 discrete regions of cell bodies **(G)** and neuritic projections **(H)**. **(I)** Left: Current  $\mu$ TENN dimensions. Middle:  
721 Unidirectional  $\mu$ TENNs synapse host neurons (purple) to relay inputs to targeted cortical regions. Right: Host  
722 neurons synapse bidirectional  $\mu$ TENNs, relaying activity from host cortex to the dorsal aggregate. **(J)**  $\mu$ TENNs as  
723 transplantable input/output channels. *Inputs*: an LED array (1) optically stimulates a unidirectional,  
724 channelrhodopsin-positive  $\mu$ TENN (2) to activate Layer IV neurons (3). *Outputs*: Layer V neurons (4) synapse a  
725 bidirectional  $\mu$ TENN (5); relayed neuronal activity is recorded by a microelectrode array (6). Scale bars: 100  $\mu$ m.  
726  
727

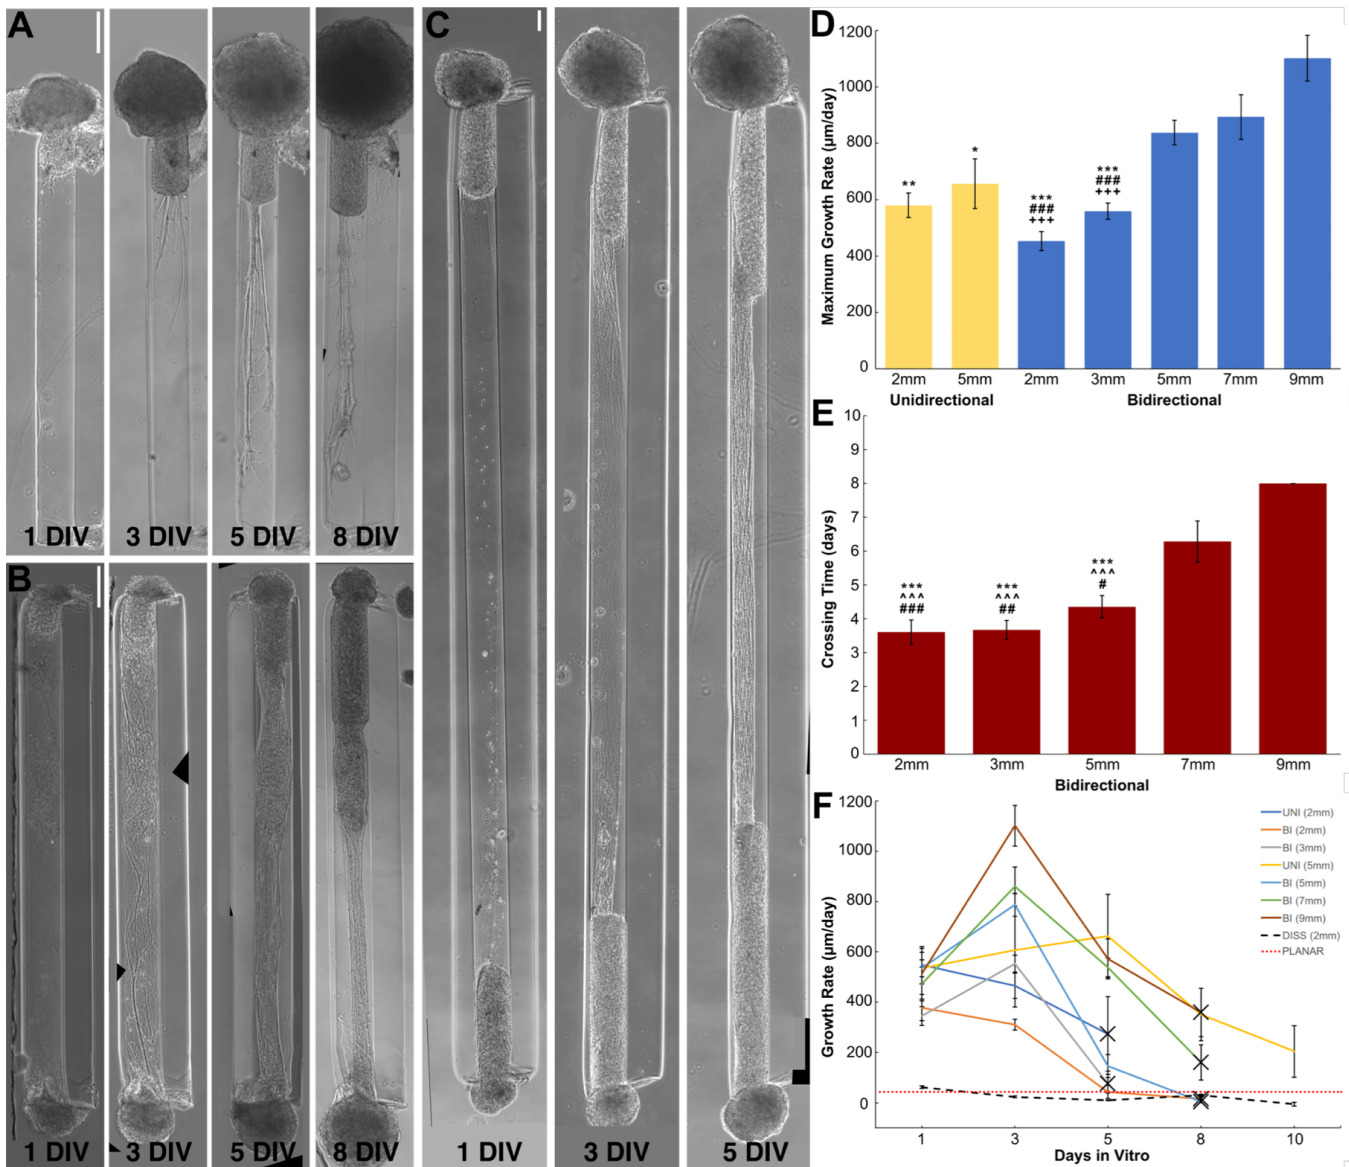

728 **Figure 2: Axonal Growth in Aggregate  $\mu$ TENN Over Time.** Both unidirectional (A) and bidirectional (B)

729  $\mu$ TENN displayed robust axonal outgrowth along the ECM core. While outgrowth within unidirectional  $\mu$ TENN

730 peaked within the first 3 DIV before declining, bidirectional  $\mu$ TENN axons crossed the length of the microcolumn,

731 synapsing with the opposing aggregate by 5 DIV. Representative 2mm  $\mu$ TENN shown at 1, 3, 5, and 8 DIV. (C)

732 Longer bidirectional  $\mu$ TENN (5 mm) took more time to develop, but still showed robust growth. Representative

733 5mm  $\mu$ TENN shown at 1, 3, and 5 DIV. (D) Average maximum growth rates across  $\mu$ TENN groups. Symbols

734 denote significant differences vs. 9mm bidirectional (\*), 7mm bidirectional (#), and 5mm bidirectional (+)

735  $\mu$ TENN, respectively. Symbol count denotes significance level (1:  $p < 0.05$ ; 2:  $p < 0.01$ ; 3:  $p < 0.001$ ).

736 (E) Average crossing times across  $\mu$ TENN groups. 5mm unidirectional  $\mu$ TENN did not fully cross by 10 DIV and

737 were not included. Symbols and symbol counts match those described in (D), with the addition of significance

738 vs. 8mm bidirectional (^). (F) Growth rates for unidirectional, bidirectional, and dissociated/traditional

739  $\mu$ TENN at 1, 3, 5, 8, and 10 DIV; dashed red line represents the average growth rate for planar cultures. Growth

740 rates were quantified by identifying the longest neurite from an aggregate in phase microscopy images (10X

741 magnification) at the listed timepoints. Crosses indicate axons crossing the length of the microcolumn

742 (unidirectional) or connecting between aggregates (bidirectional). Error bars denote s.e.m. Scale bars: 200  $\mu$ m.

743  
744  
745

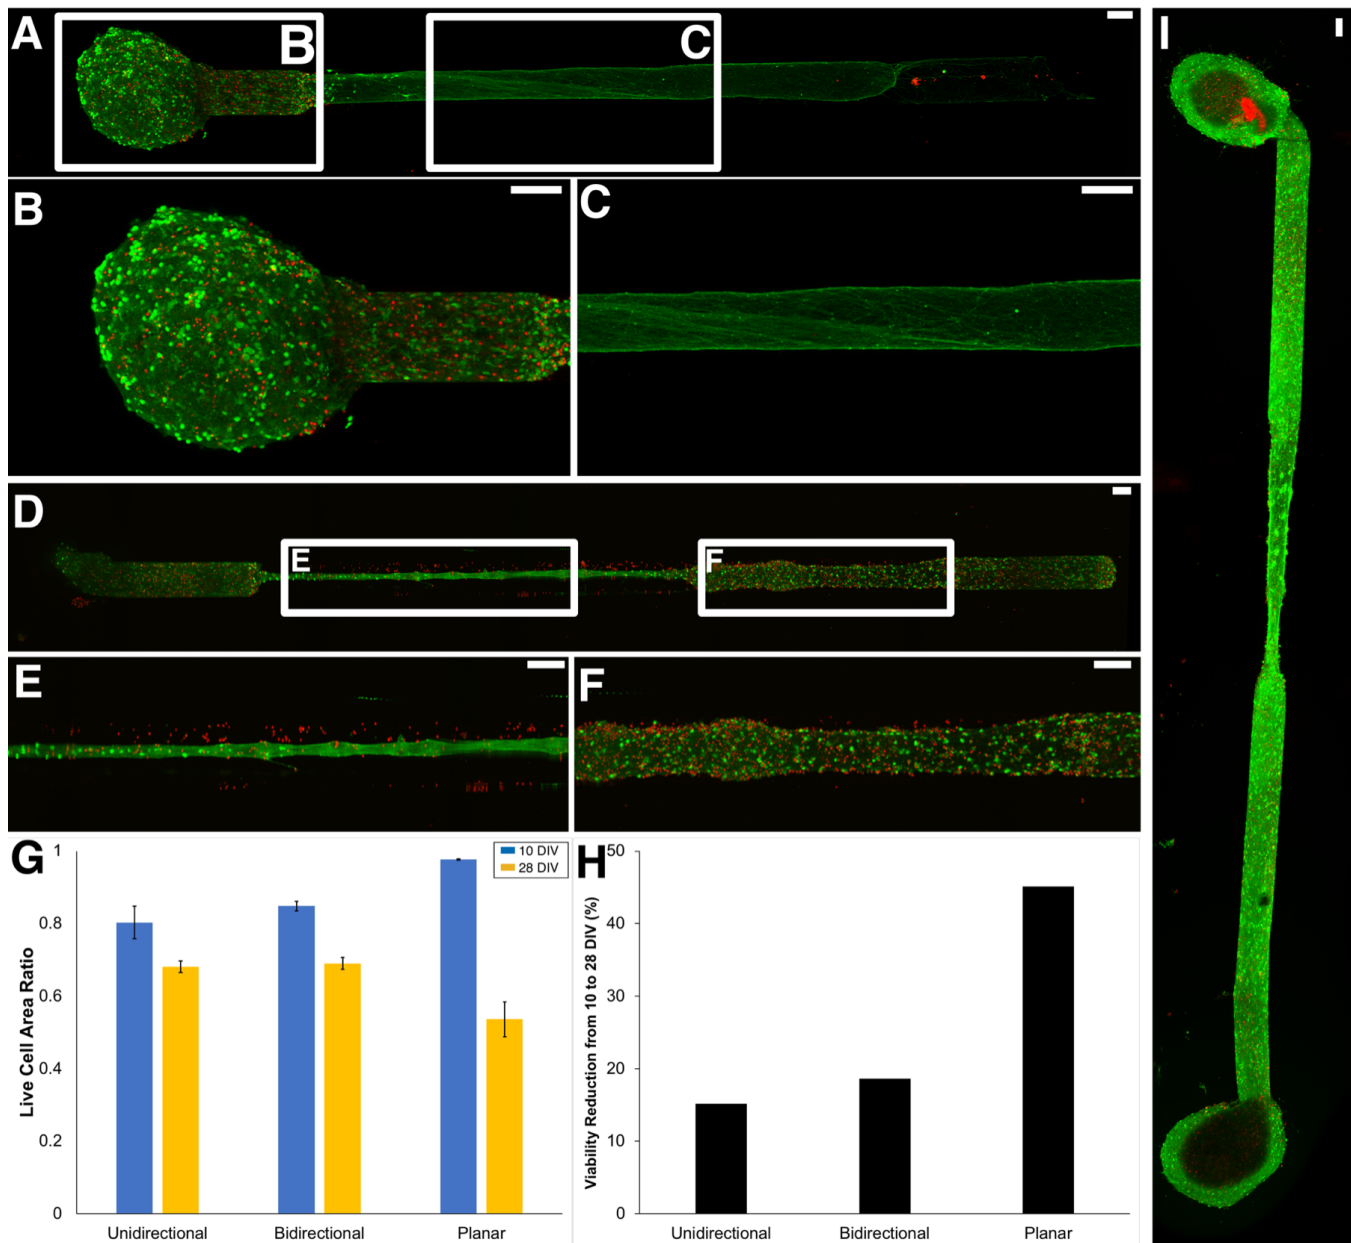

746

747

748 **Figure 3:  $\mu$ TENN Viability.** Viability for unidirectional and bidirectional  $\mu$ TENNs and age-matched two-  
 749 dimensional controls was quantified via live-dead (calcein-AM/ethidium homodimer) staining at 10 and 28 DIV. (a,  
 750 b, c) Representative confocal live-dead images showing live cells (green), dead cells (red), and an overlay of a  
 751 unidirectional  $\mu$ TENN at 10 DIV, with outlined insets below. (d, e, f) Representative confocal live-dead image of a  
 752 bidirectional  $\mu$ TENN at 28 DIV, with outlined insets below. (G) The average proportion of live to total (live + dead)  
 753 cell body area for each experimental group and timepoint. Two-way ANOVA and post-hoc analysis revealed  
 754 several statistically relevant pairwise differences (\* =  $p < 0.05$ ; \*\* =  $p < 0.01$ ; \*\*\* =  $p < .001$ ). Symbols denote  
 755 significant differences vs. planar cultures at 10 DIV (#) and 28 DIV (\*). Error bars denote s.e.m. Sample sizes:  $n =$   
 756  $4$  and  $4$  (unidirectional);  $7$  and  $4$  (bidirectional);  $9$  and  $5$  (controls) for 10 and 28 DIV, respectively. (H) The percent  
 757 change in viability across experimental groups. All groups showed a decline in viability, with the planar cultures  
 758 nearing a three-fold drop in viability relative to the  $\mu$ TENNs. (I) Live-dead stain of a  $\mu$ TENN at 40 DIV. Scale bars:  
 759  $100 \mu\text{m}$ .

759

760

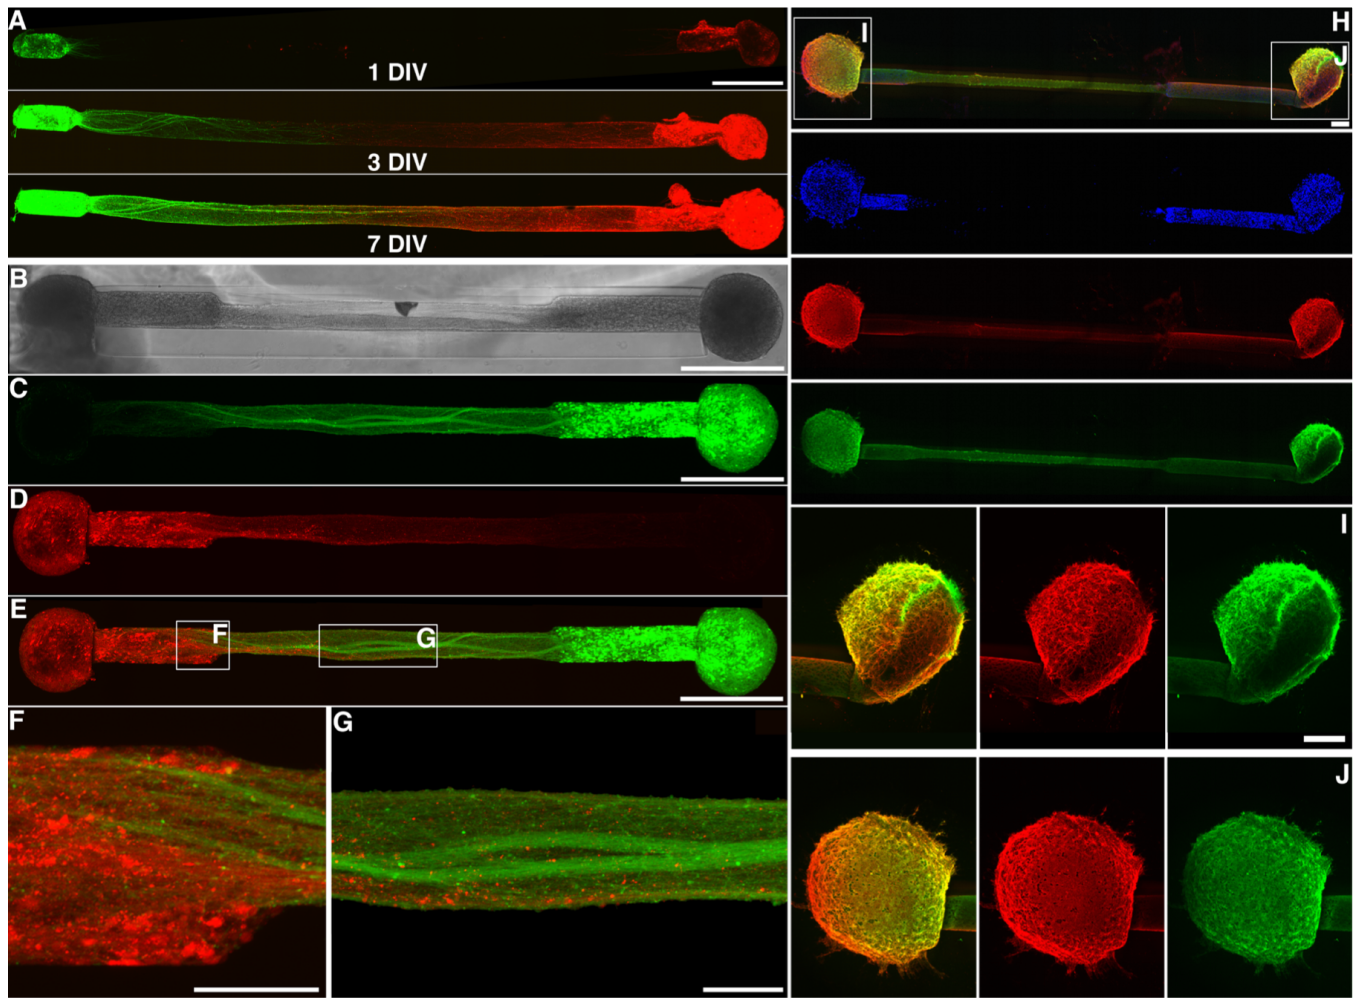

761

762

763

764

765

766

767

768

769

770

771

772

**Figure 4:  $\mu$ TENN Growth and Architecture.** Bidirectional  $\mu$ TENNs were labeled with GFP (green) and mCherry (red) to observe aggregate-specific axonal growth and structure *in vitro*. **(A)** Confocal reconstructions of a bidirectional, GFP/mCherry-labeled  $\mu$ TENN at 1, 3 and 7 DIV. **(B)** Phase image of a bidirectional, GFP/mCherry-labeled  $\mu$ TENN at 5 DIV. **(C-E)** Confocal reconstruction of the  $\mu$ TENN from (B) at 7 DIV, with insets showing axons from each aggregate growing along each other **(F)** and axons from one aggregate making contact with the opposite population **(G)**. **(H)** Confocal reconstruction of a representative bidirectional  $\mu$ TENNs at 10 DIV immunolabeled for cell nuclei (Hoechst; blue), axons (Tuj-1; red), and synapses (synapsin; green). Insets in (H) refer to callout boxes **(I)** and **(J)** showing zoom-ins of synapses, axonal networks, and the overlay of the two. Scale bars: 500  $\mu$ m (A, B, C, E); 100  $\mu$ m (F, G); 200  $\mu$ m (H, I).

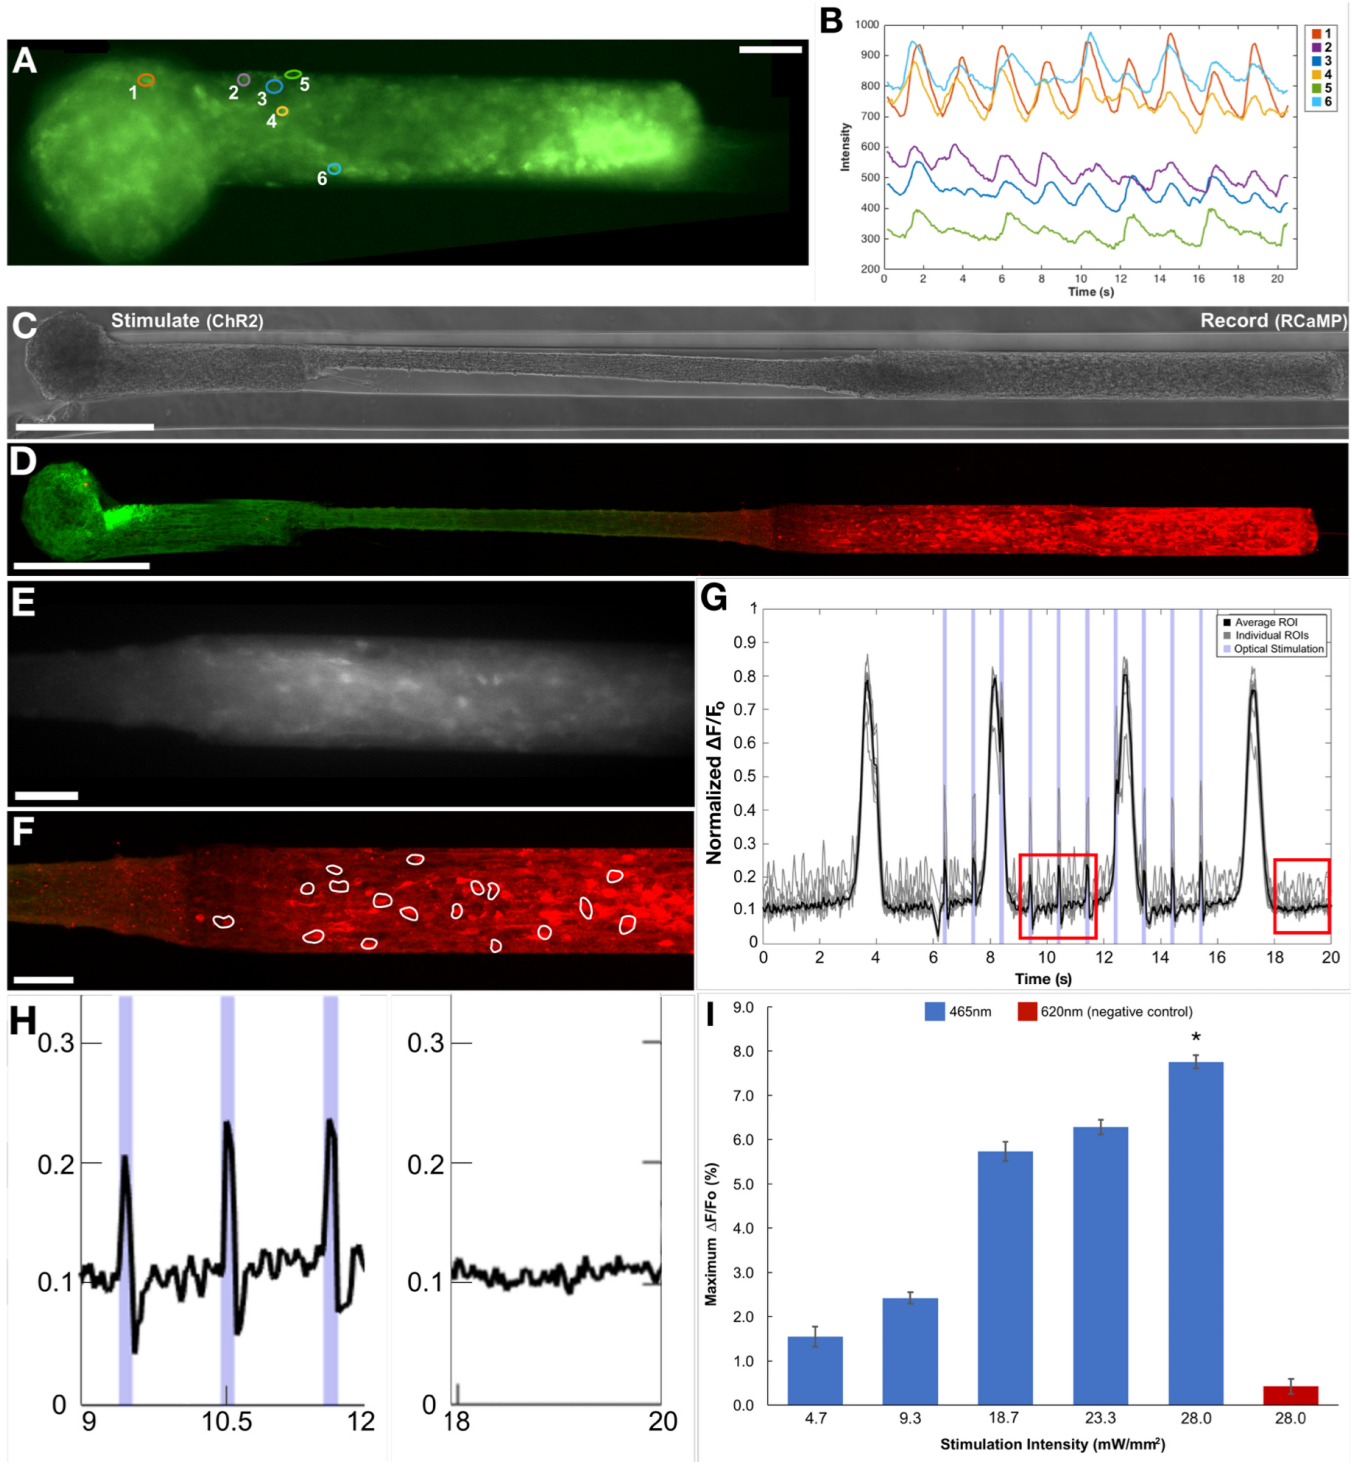

773

774

**Figure 5: Simultaneous Optical Stimulation and Recording in  $\mu$ TENN.**  $\mu$ TENN transduced to express both

an optical actuator and a fluorescent calcium reporter may be controlled and monitored with light. **(A)**

Representative micro-TENN transduced with GCaMP6 at 10 DIV. **(B)** Intensities of the ROIs from (A) recorded

over time. Intensities shown are normalized to the average of a background region (i.e. away from the micro-

TENN). **(C)** Phase image and **(D)** confocal reconstruction of a  $\mu$ TENN at 10 DIV *in vitro*, with the left aggregate

transduced with ChR2 and the right aggregate transduced with the calcium reporter RCaMP. **(E)** The RCaMP-

positive aggregate from (D) under fluorescent microscopy during recording (16 fps). **(F)** Confocal reconstruction of

780

781 (D) post-stimulation. ROIs containing single neurons were manually defined (white outlines). (G) Normalized pixel  
782 intensity of ROIs within the RCaMP+ aggregate from (a-c) during stimulation. Grey lines indicate representative,  
783 user-defined ROIs randomly selected for analysis, which were averaged to obtain a mean ROI of the aggregate  
784 (solid black line). The timestamps of a single train of 1 Hz, 100ms stimulation pulses are shown as blue bands  
785 along the abscissa. The changes in pixel intensity due to stimulation of the input aggregate can be seen as sharp  
786 spikes occurring within the endogenous, large-amplitude slow-wave activity. (H) Zoom-ins of the red insets from  
787 (G) showing  $\mu$ TENN activity during (left) stimulation and after (right) optical stimulation. (I) Average maximum  
788  $\Delta F/F_0$  across stimulation intensities (at the aggregate). Although the maximum  $\Delta F/F_0$  trended upward, the  
789 differences were not significant across intensities. Statistical comparison revealed that stimulation with the control  
790 wavelength (620nm) yielded significantly lower maximum  $\Delta F/F_0$  than with 465nm (\* =  $p < 0.05$ ). Scale bars: 100  
791  $\mu$ m.

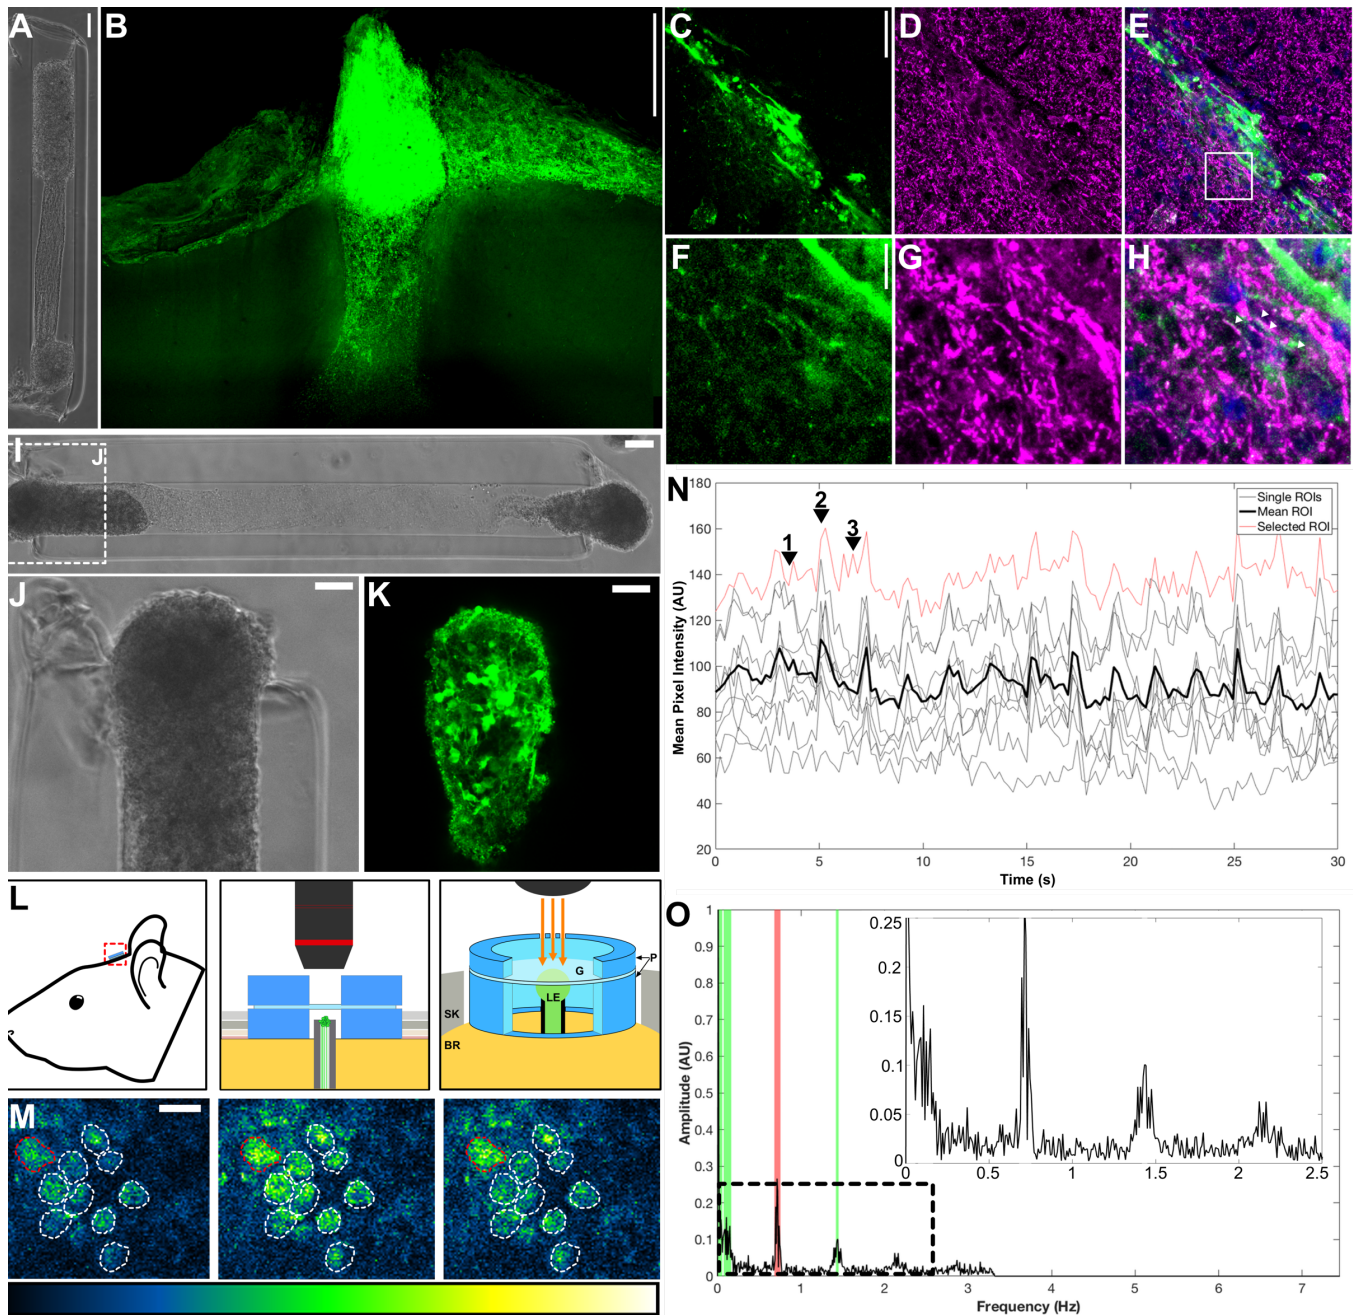

792

793

794

795

796

797

798

799

800

801

802

803

804

**Figure 6: Living Electrode Survival, Integration, and Function *in Vivo*.** (A) Phase image of a bidirectional  $\mu$ TENN prior to implantation; aggregates have been internalized to the microcolumn. (B) Multiphoton image of the  $\mu$ TENN from (A) at one-month post-implant, showing GCaMP-positive  $\mu$ TENN neurons and processes within and immediately surrounding the construct. At one month, the dorsal aggregate had descended into the microcolumn, suggesting externalized aggregates may be required to maintain a cohesive neuronal population at the surface. (C-E) Confocal image of a  $\mu$ TENN at one-month post implant, with synapsin<sup>+</sup> puncta at and around the  $\mu$ TENN/brain interface. Shown are  $\mu$ TENN neurons (GFP; green), synapses (synapsin; purple) and nuclei (Hoechst, blue). (F-H) Zoom-ins of inset from (E) with colocalization of synapsin and GFP suggesting synaptic integration. (I) Phase image of a GCaMP+  $\mu$ TENN prior to implant. Inset refers to (J) showing the dorsal aggregate. (K) Multiphoton image of the dorsal aggregate of the  $\mu$ TENN, acquired immediately post-implant. (L) Conceptual schematic of the  $\mu$ TENN and cranial window. Inset shows in more detail the PDMS rings (P) sized to the skull craniotomy (SK) securing the glass coverslip (G) and protecting the implanted  $\mu$ TENN and underlying



805 brain (BR), which may then be imaged chronically (orange arrows). **(M)** Single frames from multiphoton recording  
806 of the  $\mu$ TENN from (a-b) at 10 days post-implant during low activity (left), breathing (middle), and non-artifact  
807 neuronal activity (right). ROIs approximating single neurons are outlined. The LUTs scale (0-4096) is provided  
808 below. **(N)** Time course of calcium fluorescence from (E), showing the individual ROIs (grey/red) and average  
809 fluorescence across the aggregate. The red trace represents the ROI outlined in red in (E). Numbered arrows  
810 denote timestamps from (E). A sample of the recording can be found in Supplemental Video 3. **(O)** Fourier  
811 transform of the data from (F), showing spectral peaks due to the breathing rate as measured during imaging  
812 (red) and neuronal activity (green). Inset shows low-frequency activity similar to that observed *in vitro*. Scale bars:  
813 500  $\mu$ m (B); 100  $\mu$ m (A); 50  $\mu$ m (C); 10  $\mu$ m (F); 100  $\mu$ m (I); 50  $\mu$ m (J, K); 20  $\mu$ m (M).  
814

815 **Supplemental Videos 1 & 2: Calcium Imaging within  $\mu$ TENNs.**

816 The two videos show spontaneous network activity within  $\mu$ TENN aggregates, visualized with the  
817 genetically encoded calcium reporter GCaMP6f. Video 1 shows the same  $\mu$ TENN aggregate shown in  
818 Figure 6E. Video 2 shows a bidirectional  $\mu$ TENN approximately 1.1mm in length, imaged at 10 days in  
819 vitro. Note that GCaMP activity can be seen in both the aggregate and axonal regions of the  $\mu$ TENN.  
820

821 **Supplemental Video 3: Simultaneous Optical Stimulation and Recording.**

822 This video shows the RCaMP<sup>+</sup> aggregate of a Chr2/RCaMP  $\mu$ TENN approximately 6mm in length,  
823 imaged at 10 DIV during an optical stimulation/recording experiment. Red arrows indicate optical  
824 stimulation of the Chr2<sup>+</sup> aggregate (outside of the field of view) at 470 nm. Output power at the optical  
825 fiber for the pulse trains was 106, 211, 317, 423, 528, and 634 mW/mm<sup>2</sup>; corresponding to 50, 100,  
826 150, 200, 250, and 300 mA current amplitude, respectively. An increase in the RCaMP<sup>+</sup> aggregate  
827 fluorescence can be seen as the intensity of the pulse trains increases over time.  
828  
829
